# Supplementary material for: Real-Time Monitoring of Metabolism during Exercise by Exhaled Breath
Source: MDPI journal article supplement (doi:10.3390/metabo11120856), 2021-12-08

## Metabolite intensity for each subject

**Figure S4.** Figures of intensity over time of all metabolites in the map, with one plot of each subject

Intensities of the mass spectrometric monitoring reflect the Fourier transformation of the image of the current measured at the detector of the orbitrap in arbitrary units – not to be confused with the exercise intensity that reflects the power relative to the athlete.

# m/z 59.0139 (glycolaldehyde)

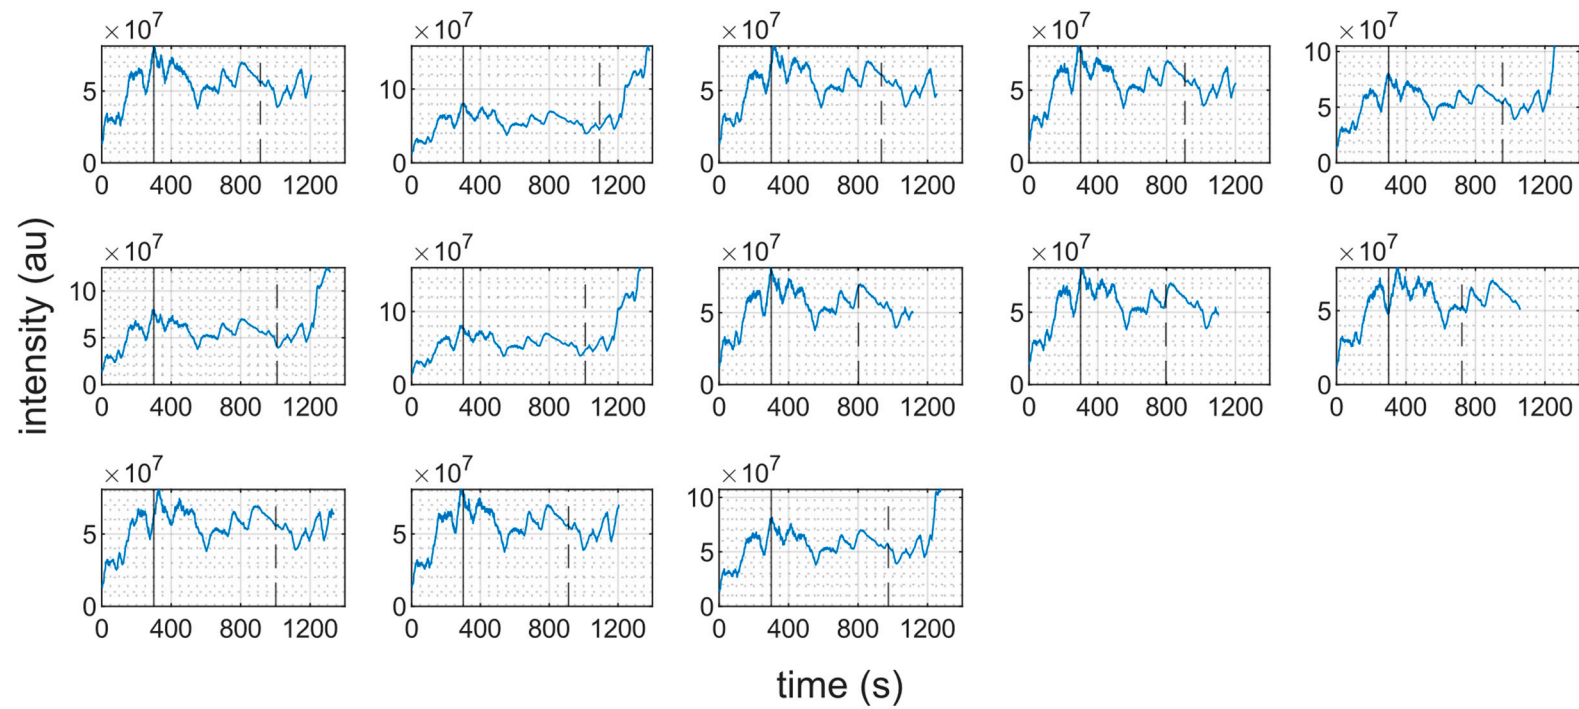

# m/z 72.9931 (glyoxylate)

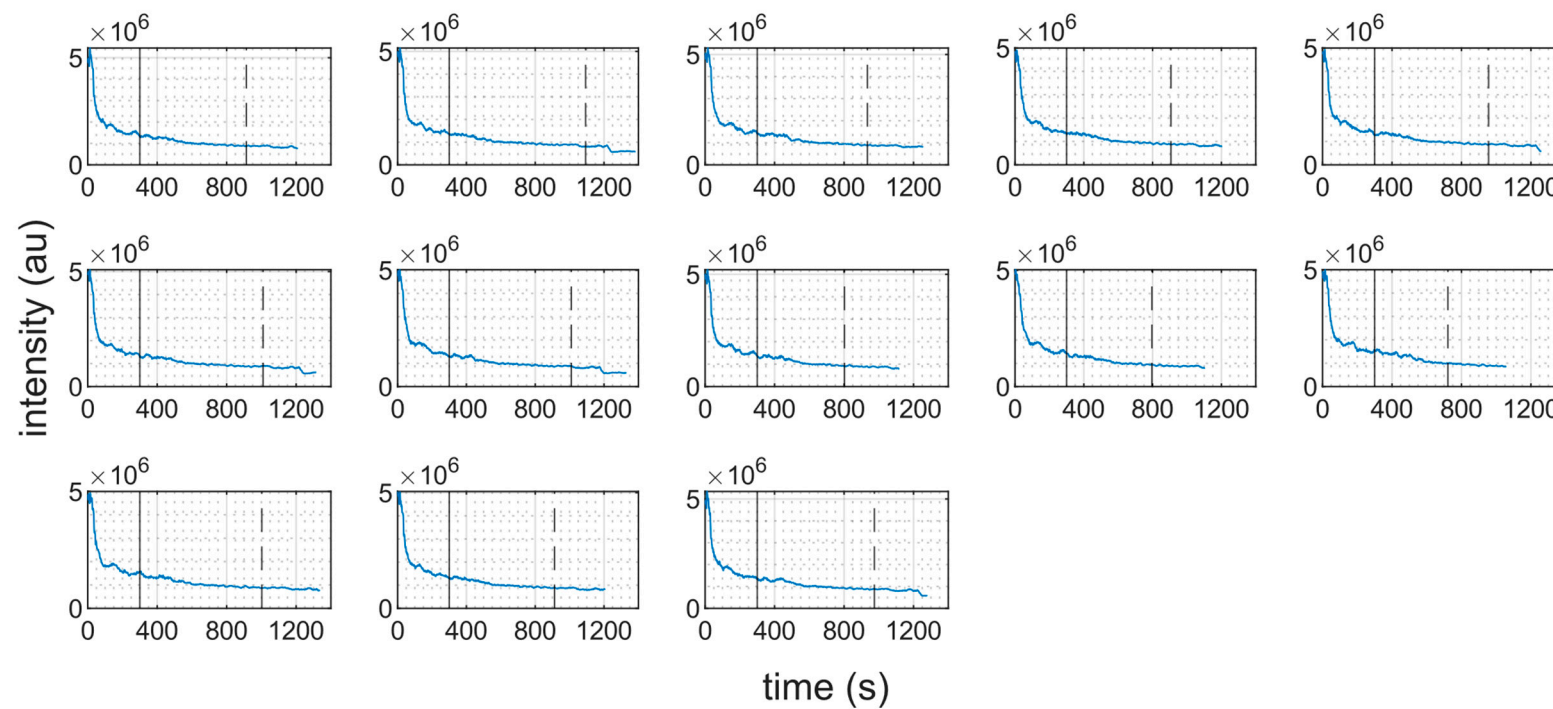

# m/z 74.0248 (glycine)

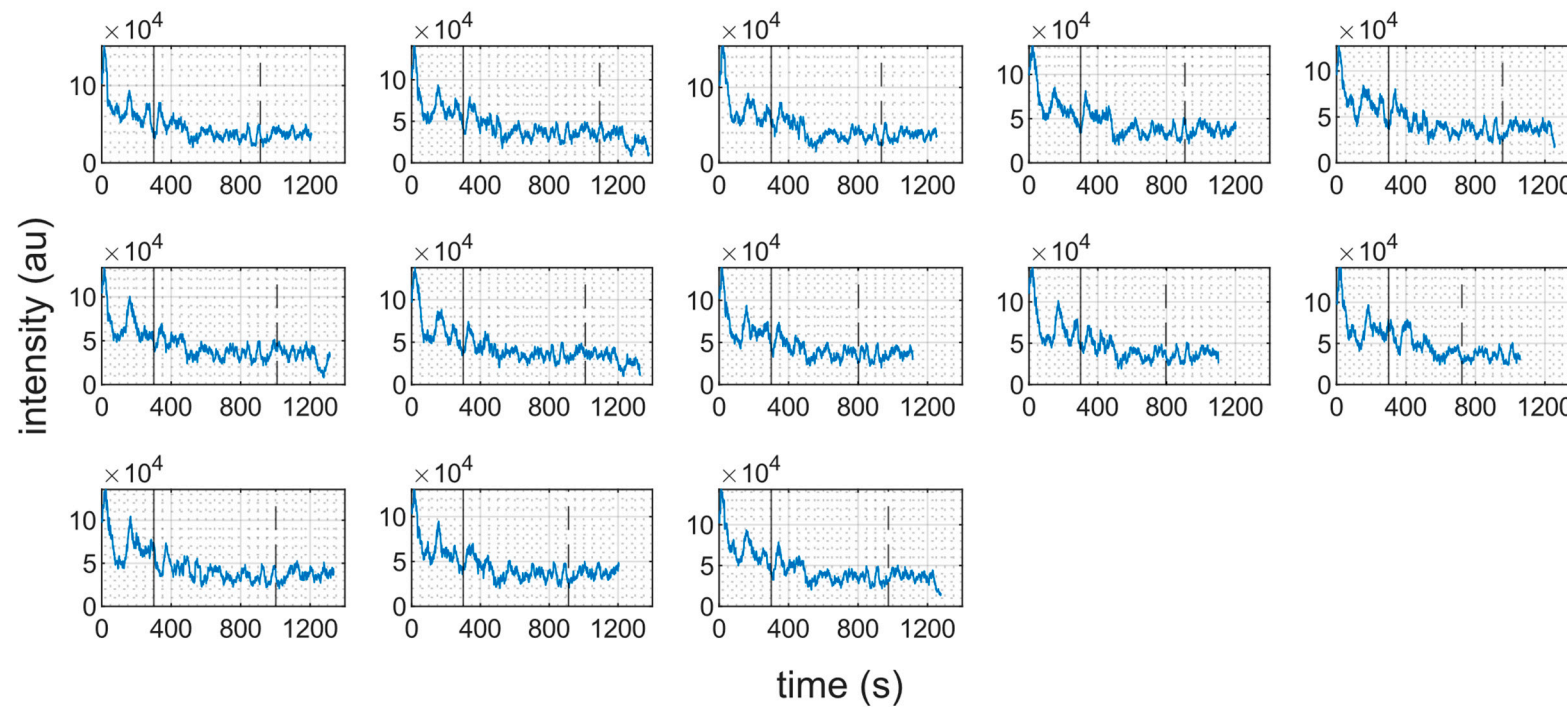



m/z 75.0088 (glycolate)

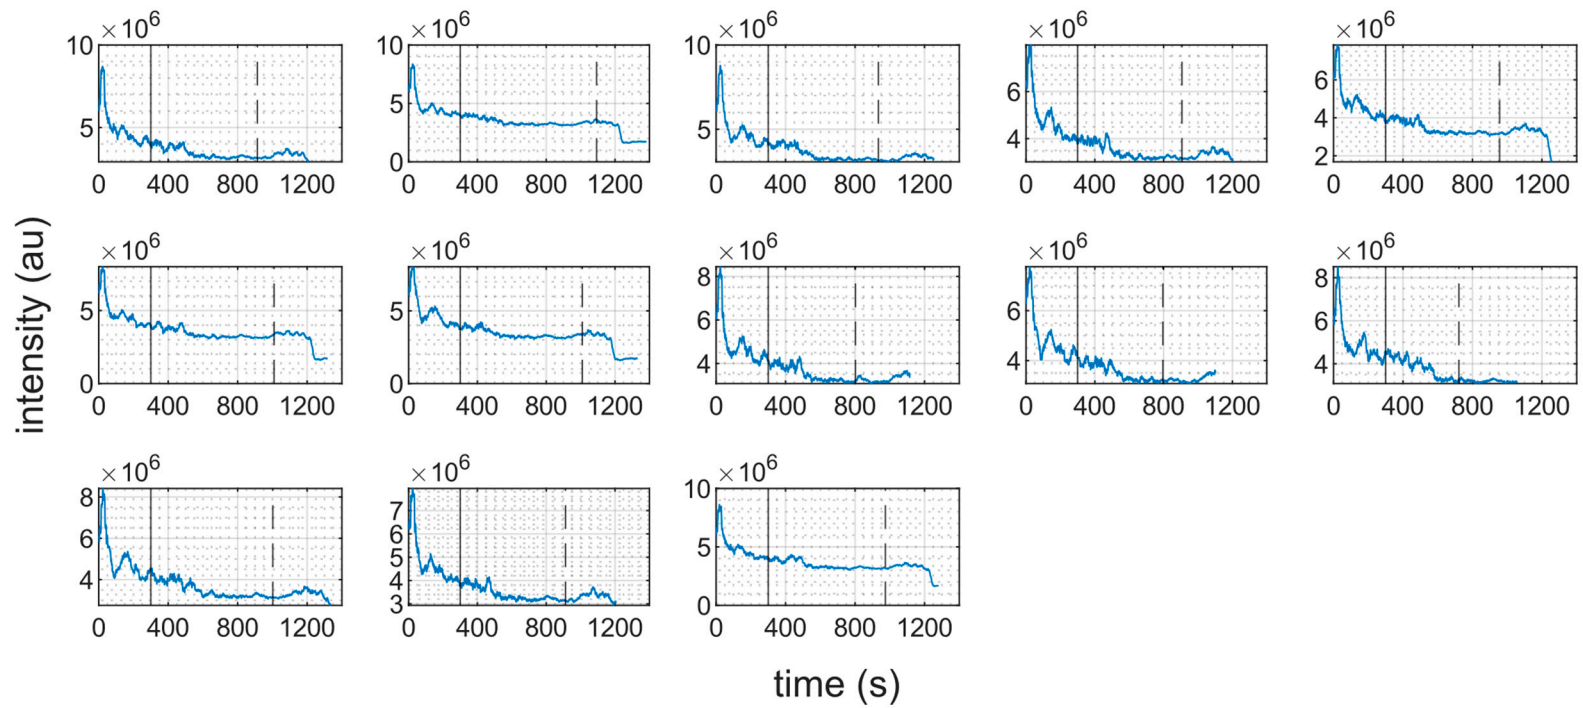

# m/z 87.0088 (pyruvate)

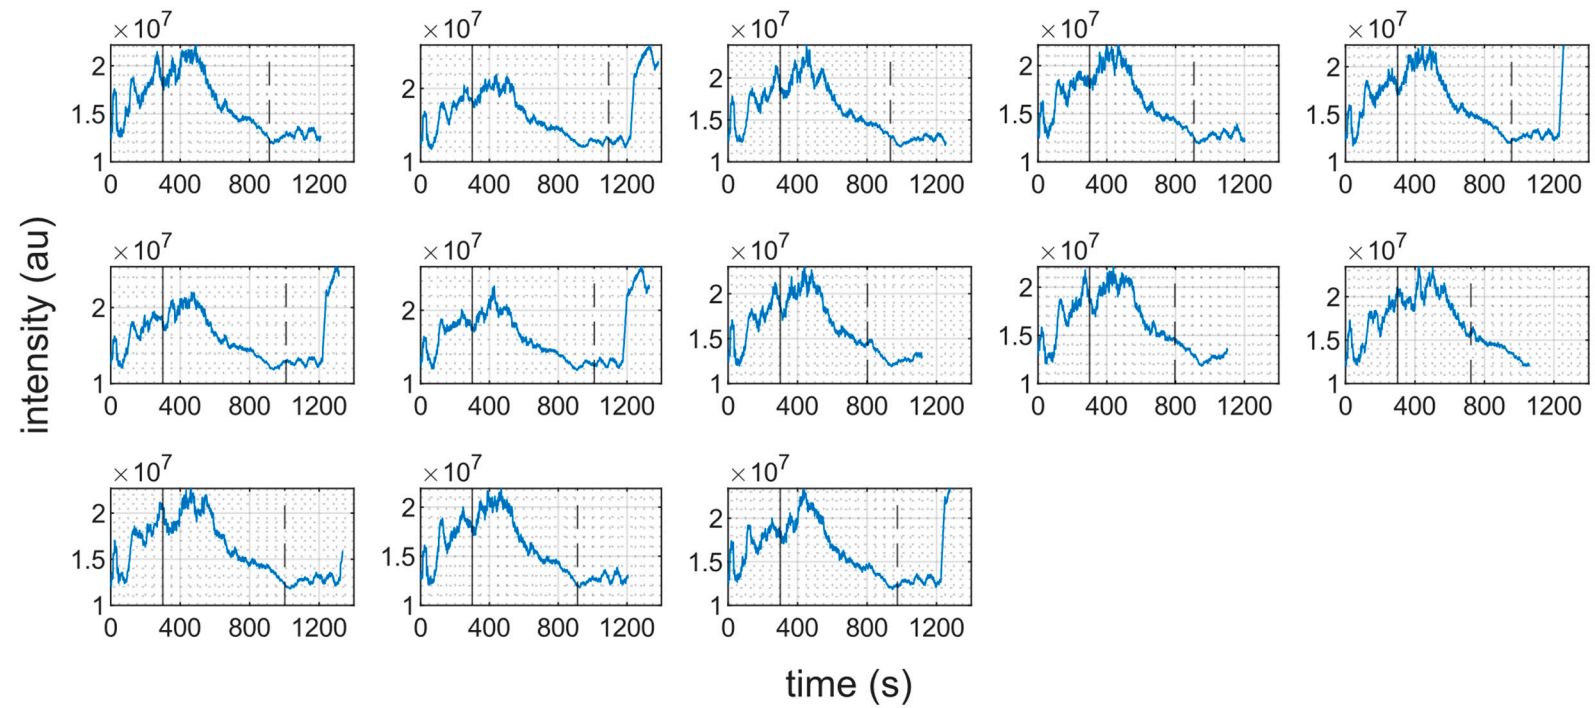

# $m/z$ 88.9881 (oxalate)

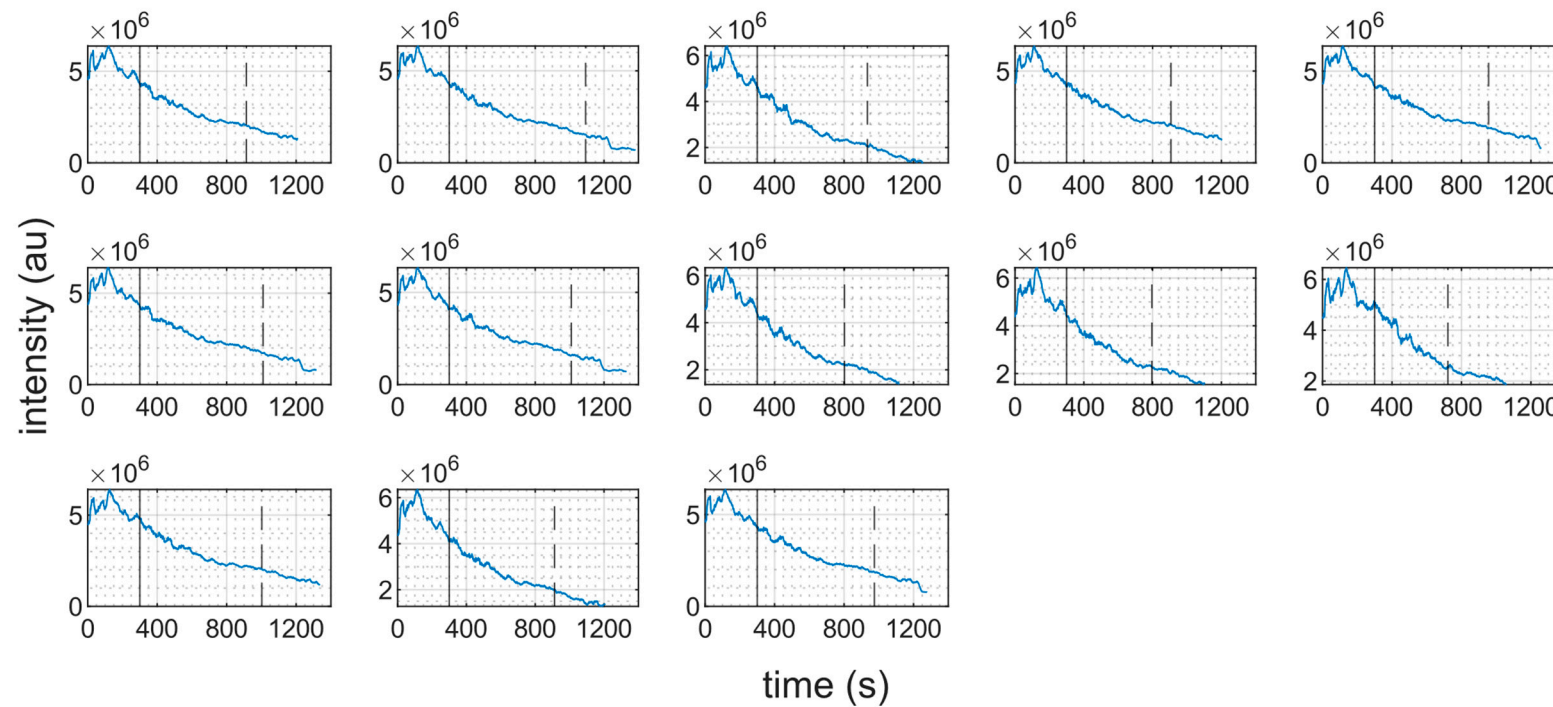

# m/z 91.0401 (glycerole)

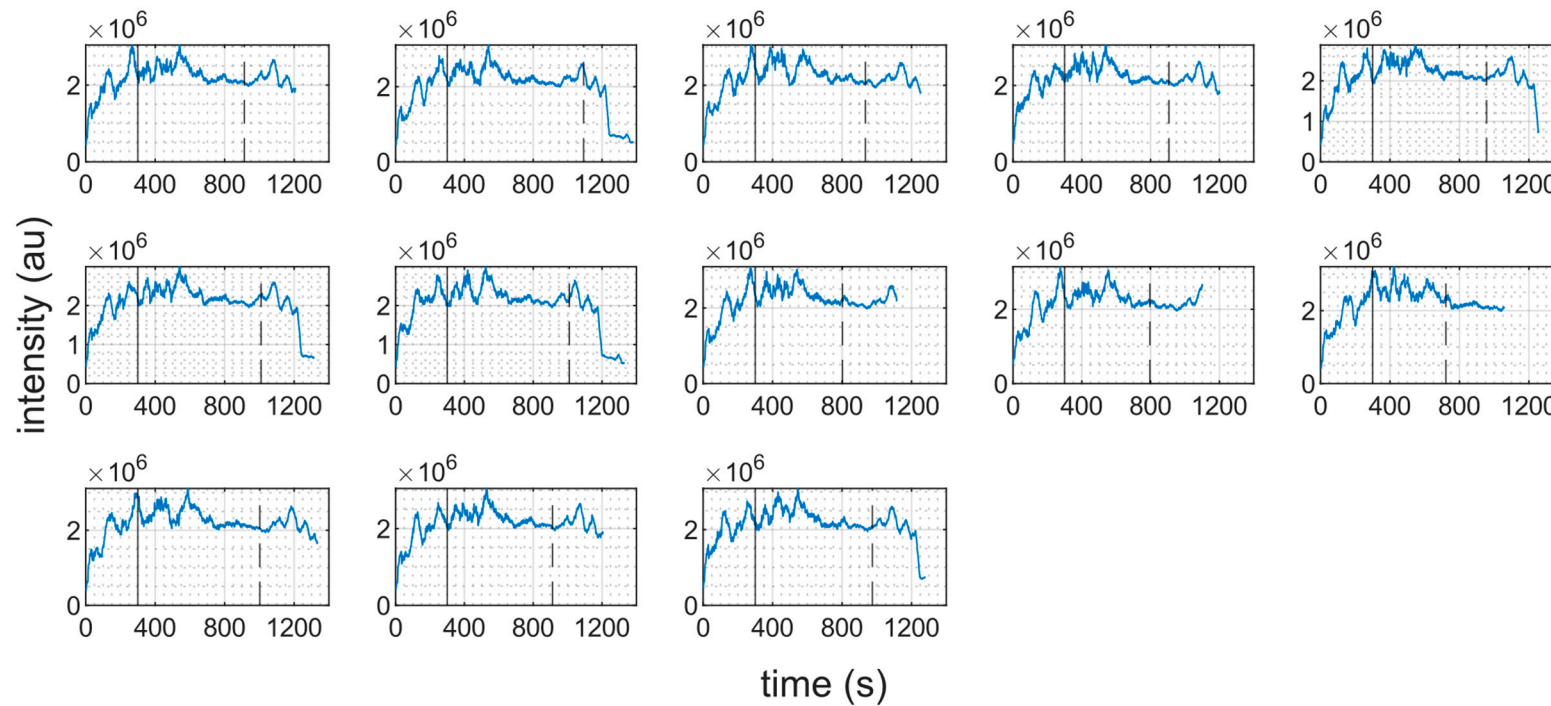

m/z 101.0244  
(acetoacetate/oxobutyric acid)

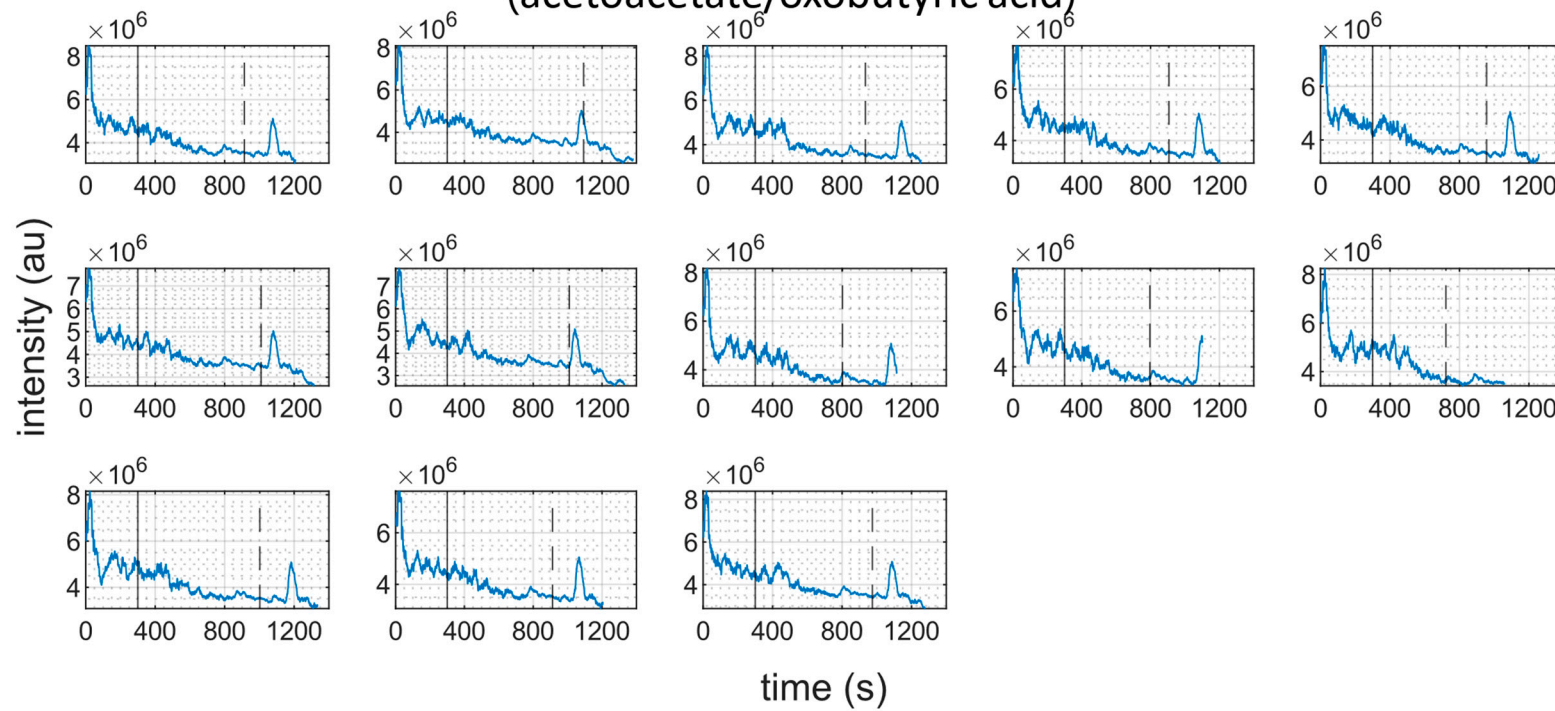



m/z 103.0037 (hydroxypyruvate)

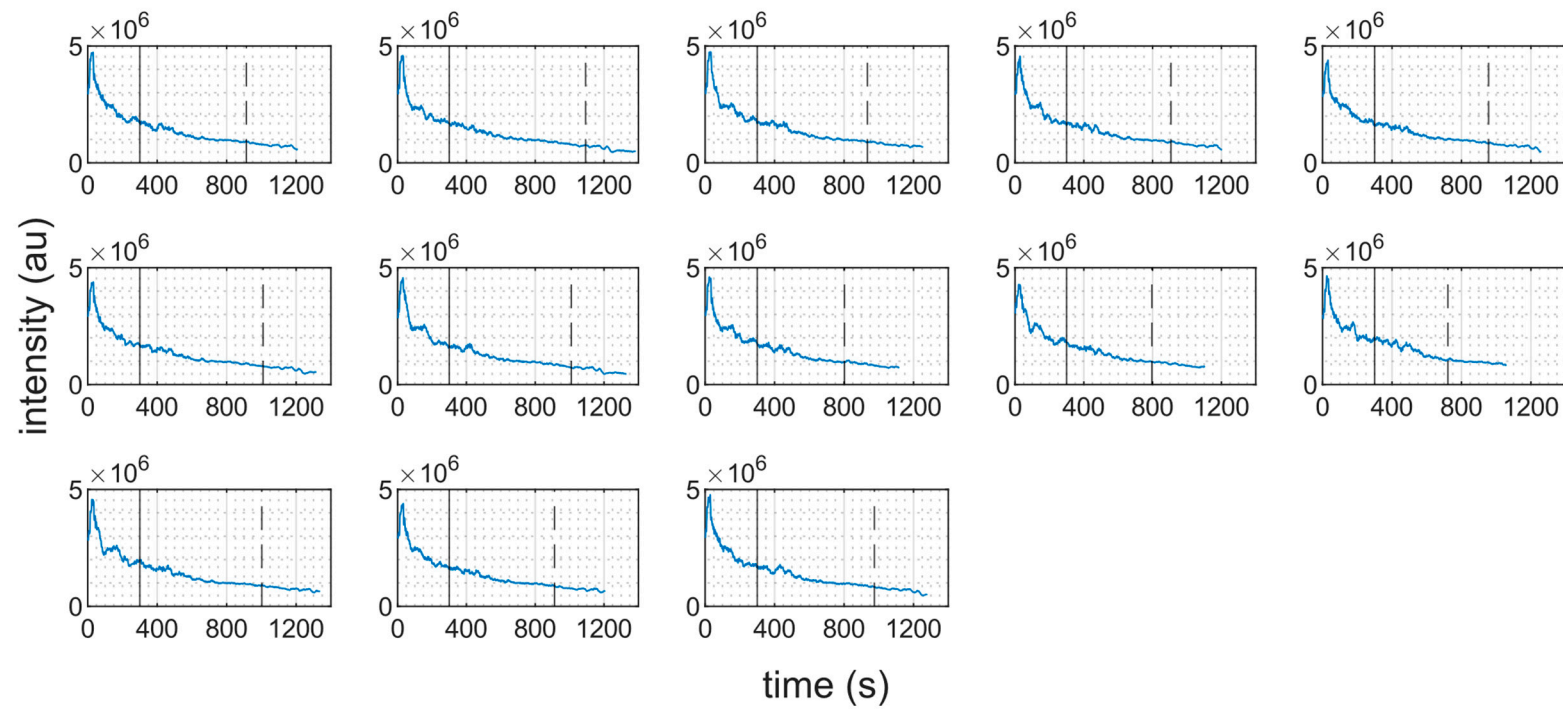

# m/z 103.0401 (hydroxybutyrate)

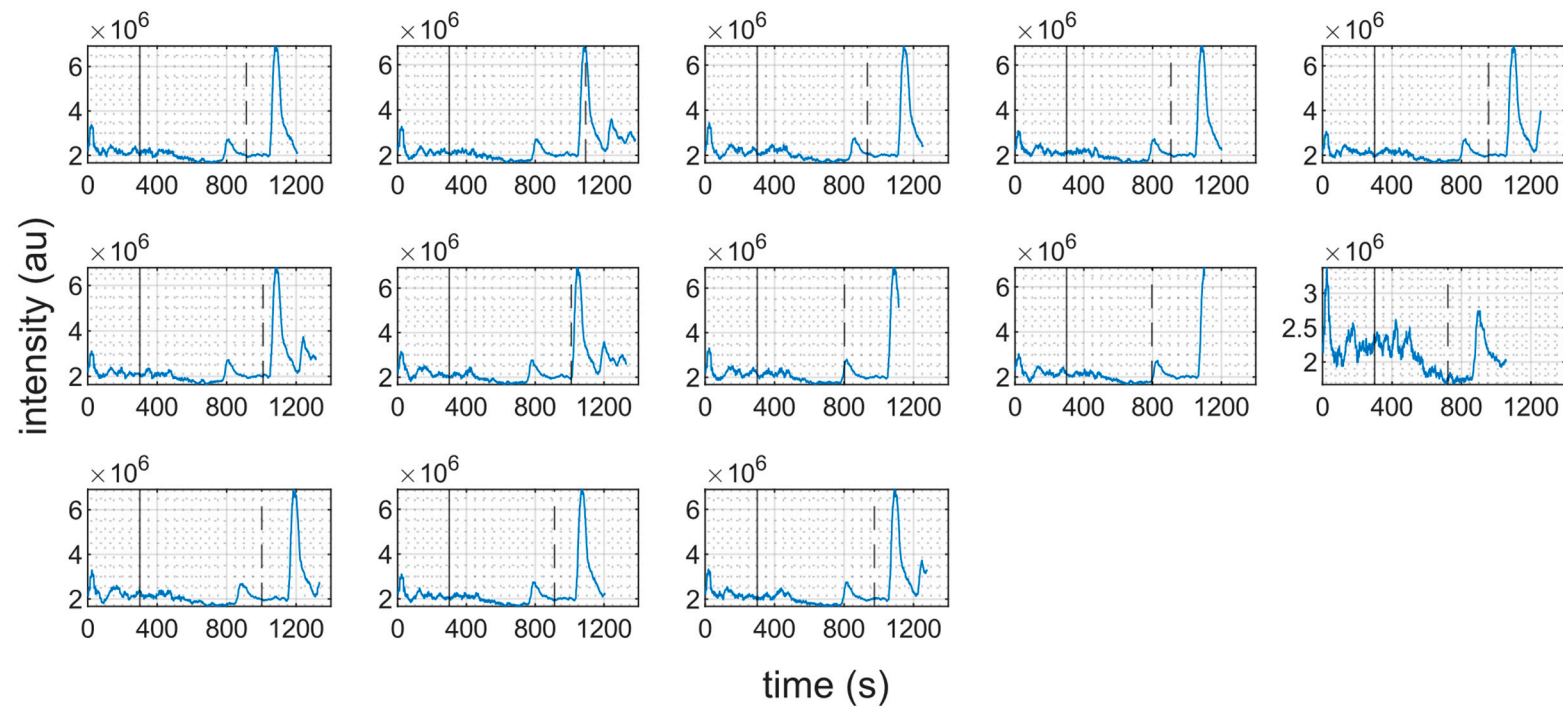



m/z 105.0193 (glycerate)

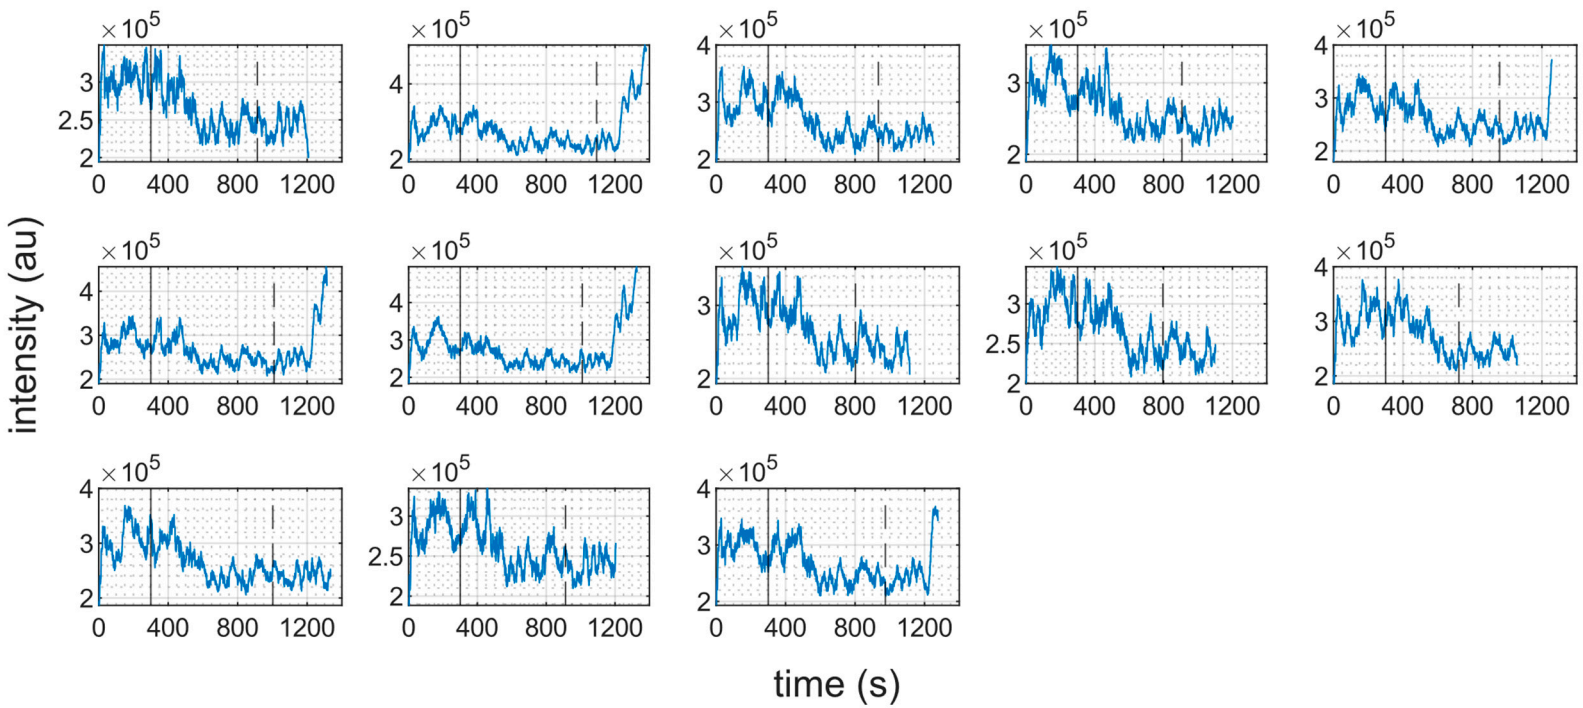

# $m/z$ 115.0037 (fumarate)

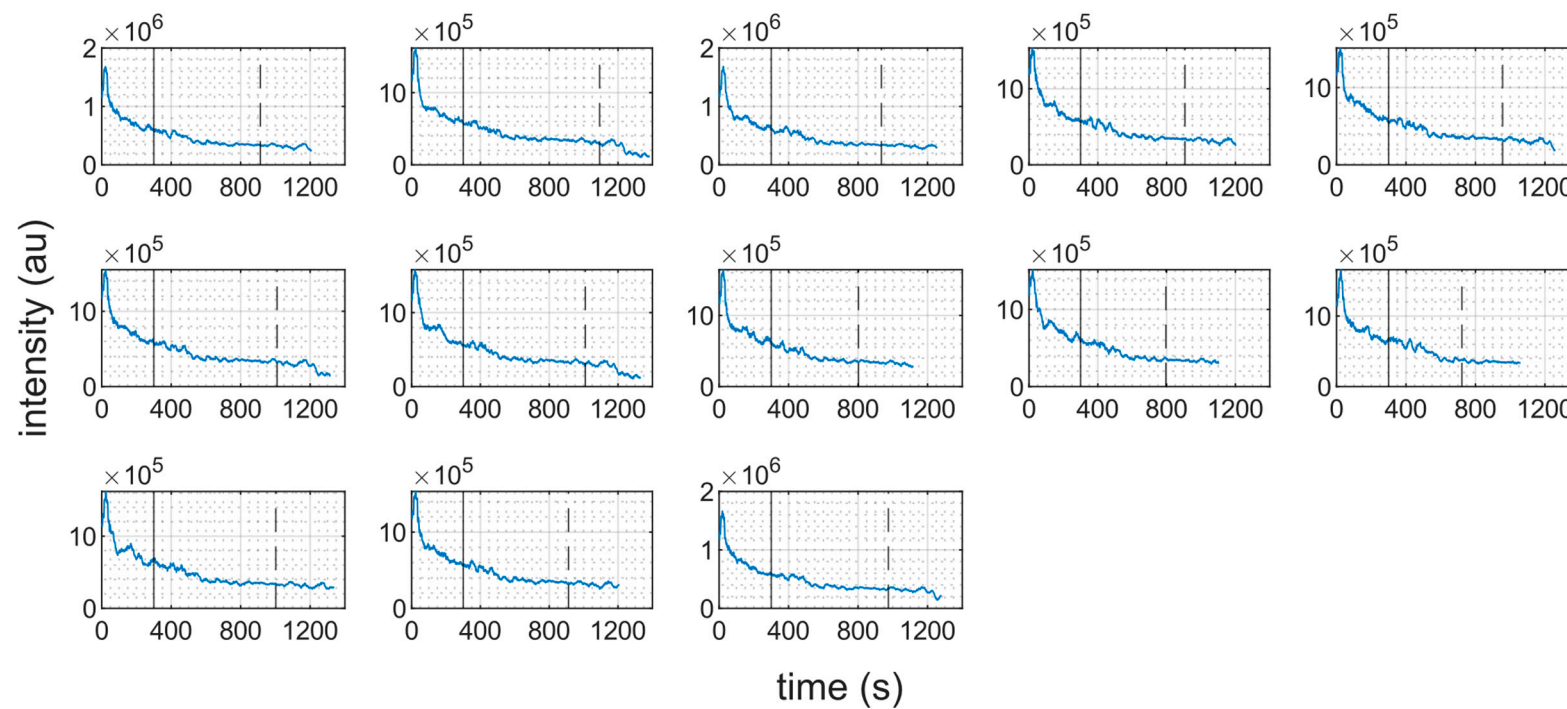

m/z 117.0194 (succinate)

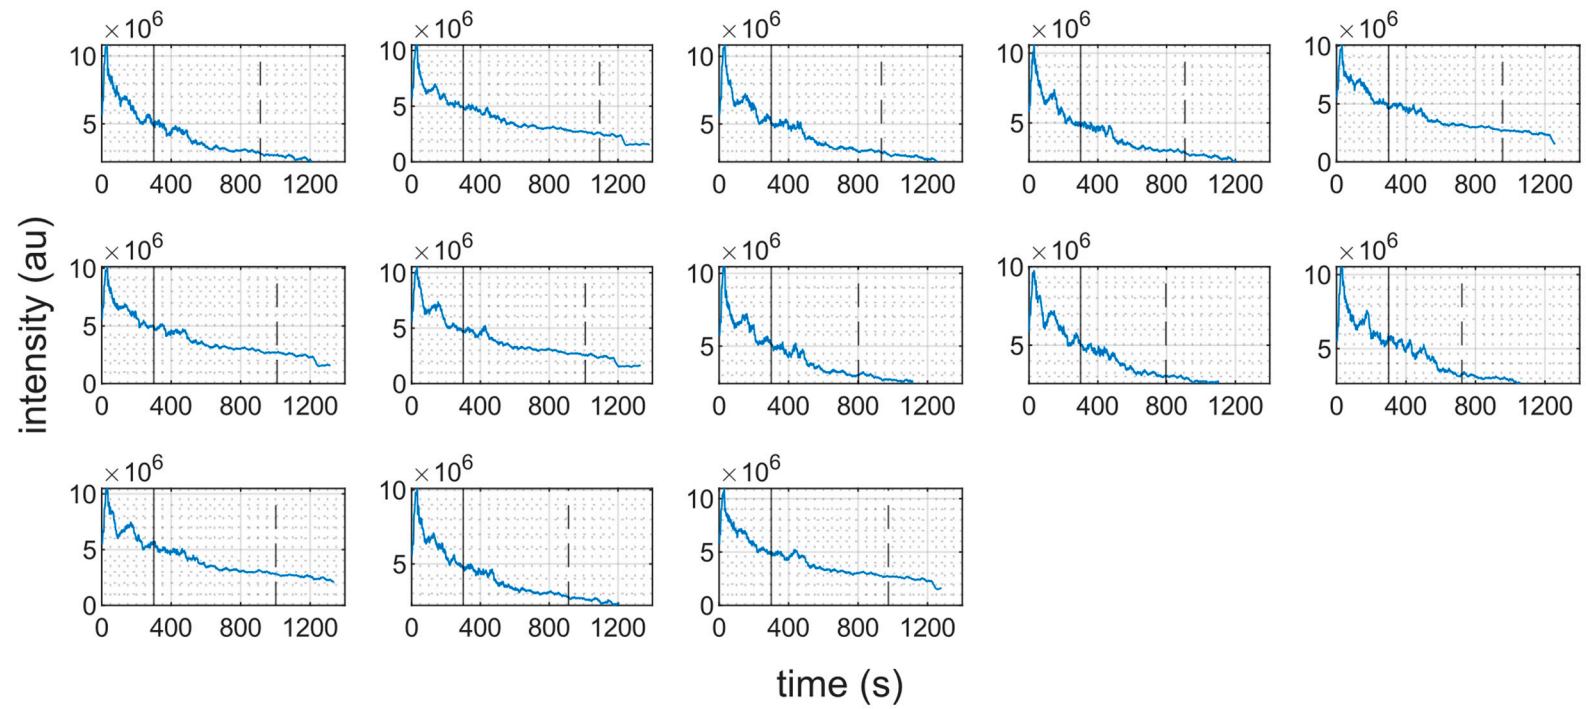

m/z 122.0248 (picolinate)

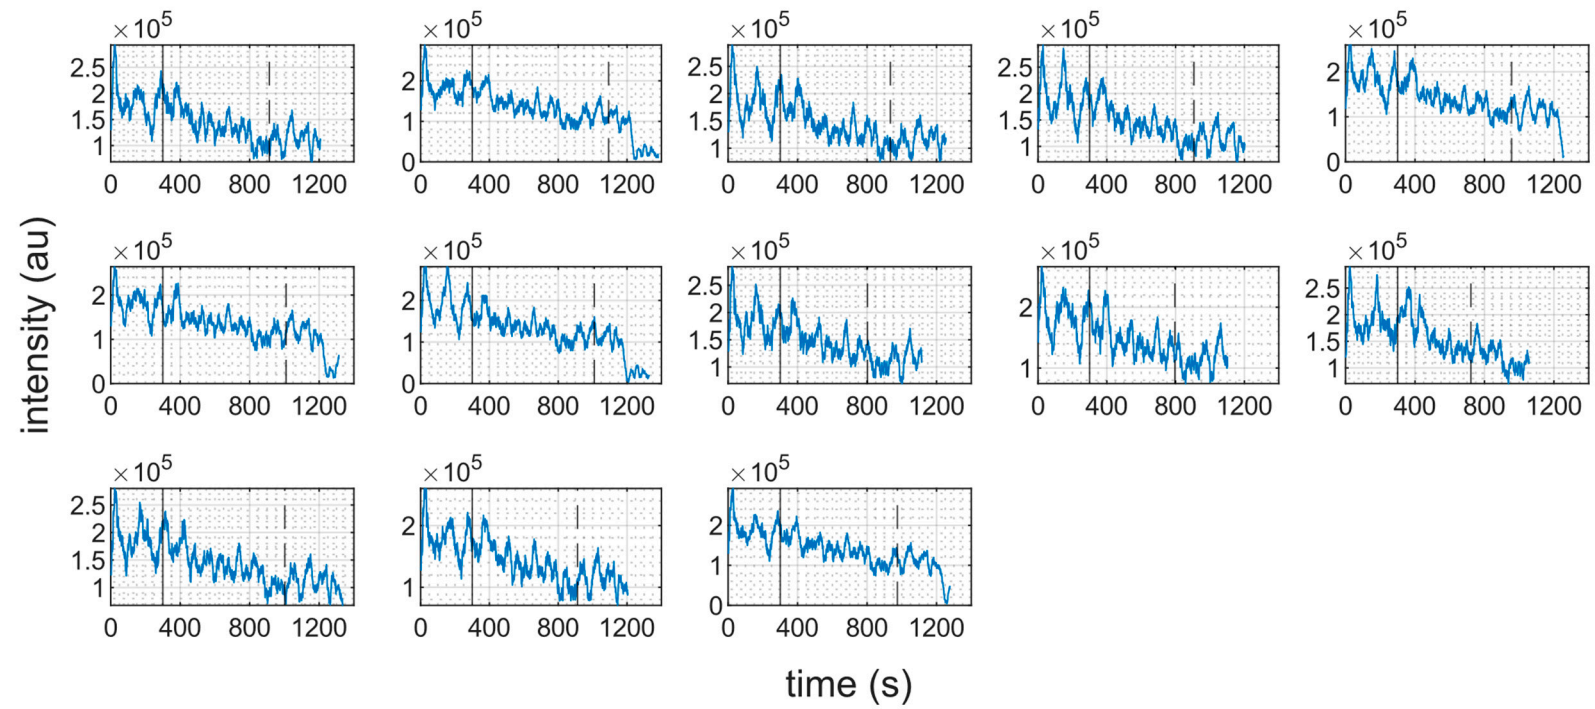

m/z 130.9986 (oxaloacetate)

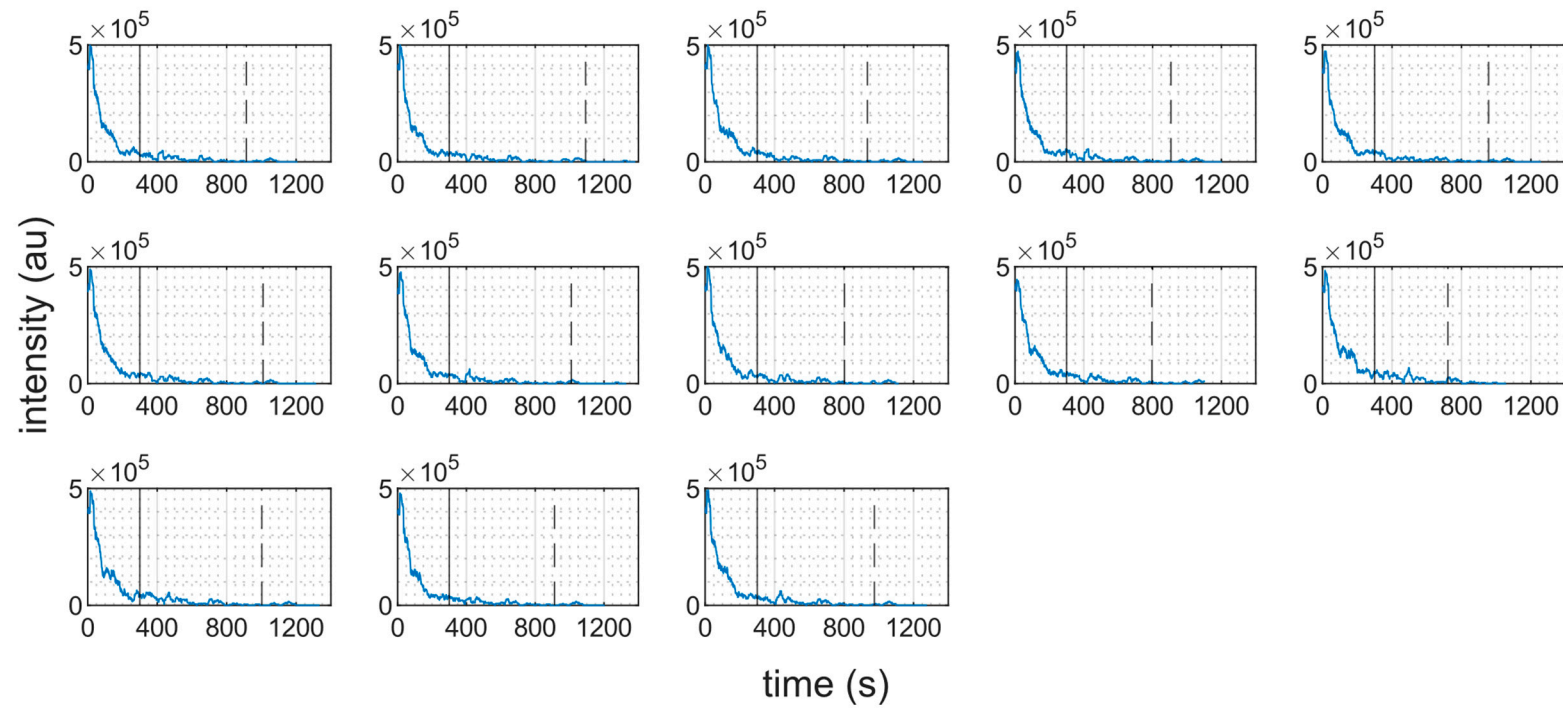



m/z 133.0143 (malate)

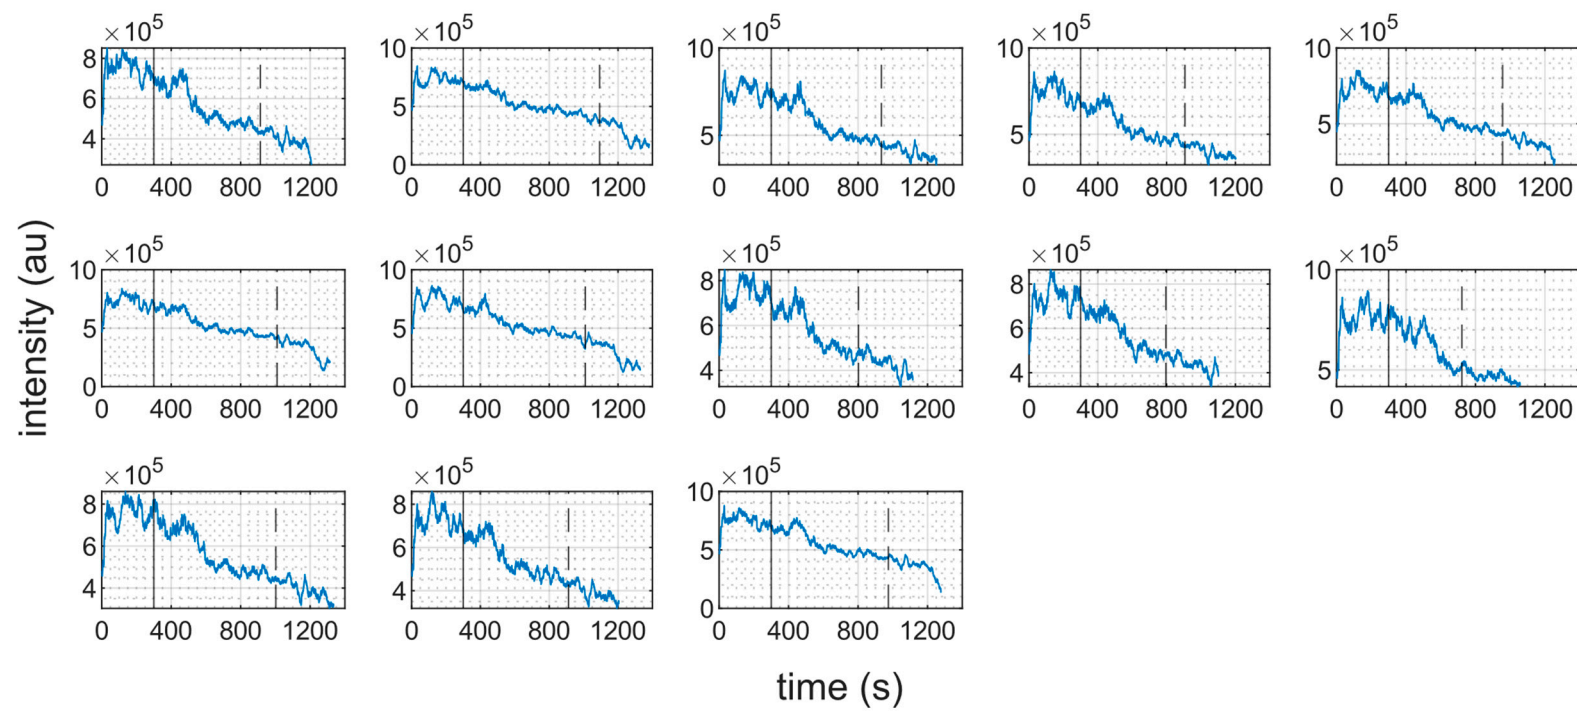

# m/z 133.0507 (deoxypentose)

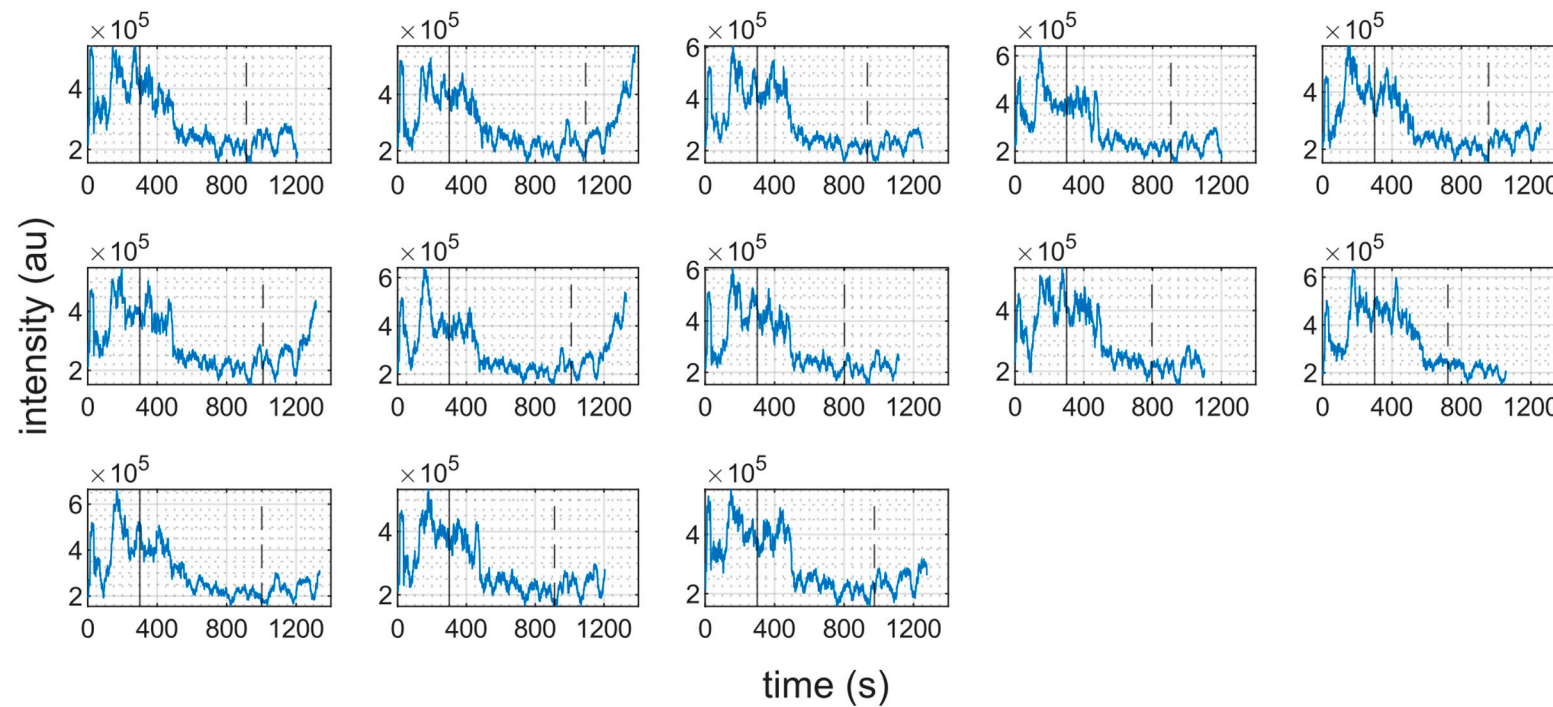



m/z 136.0404 (anthranilate)

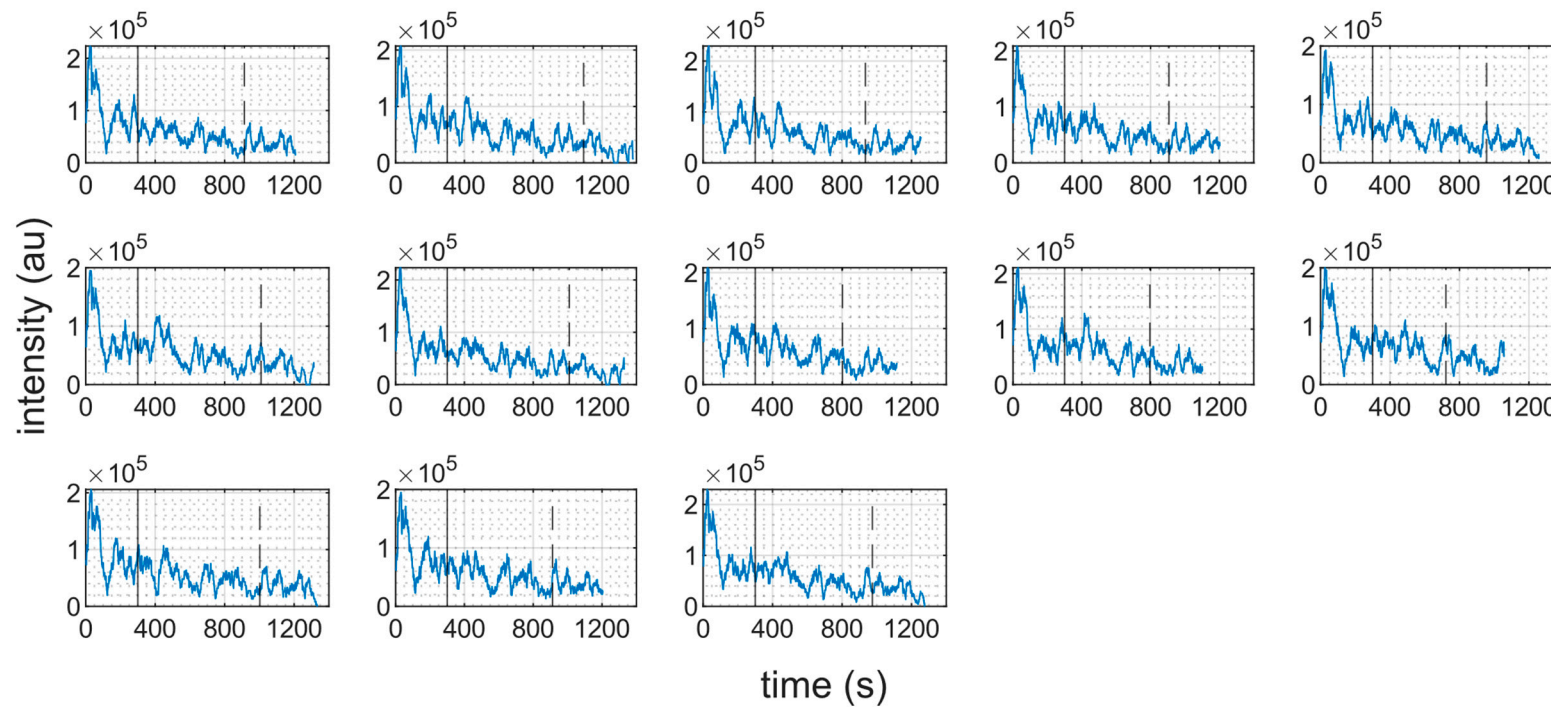

m/z 140.0353 (2-aminomuconate  
semialdehyde)

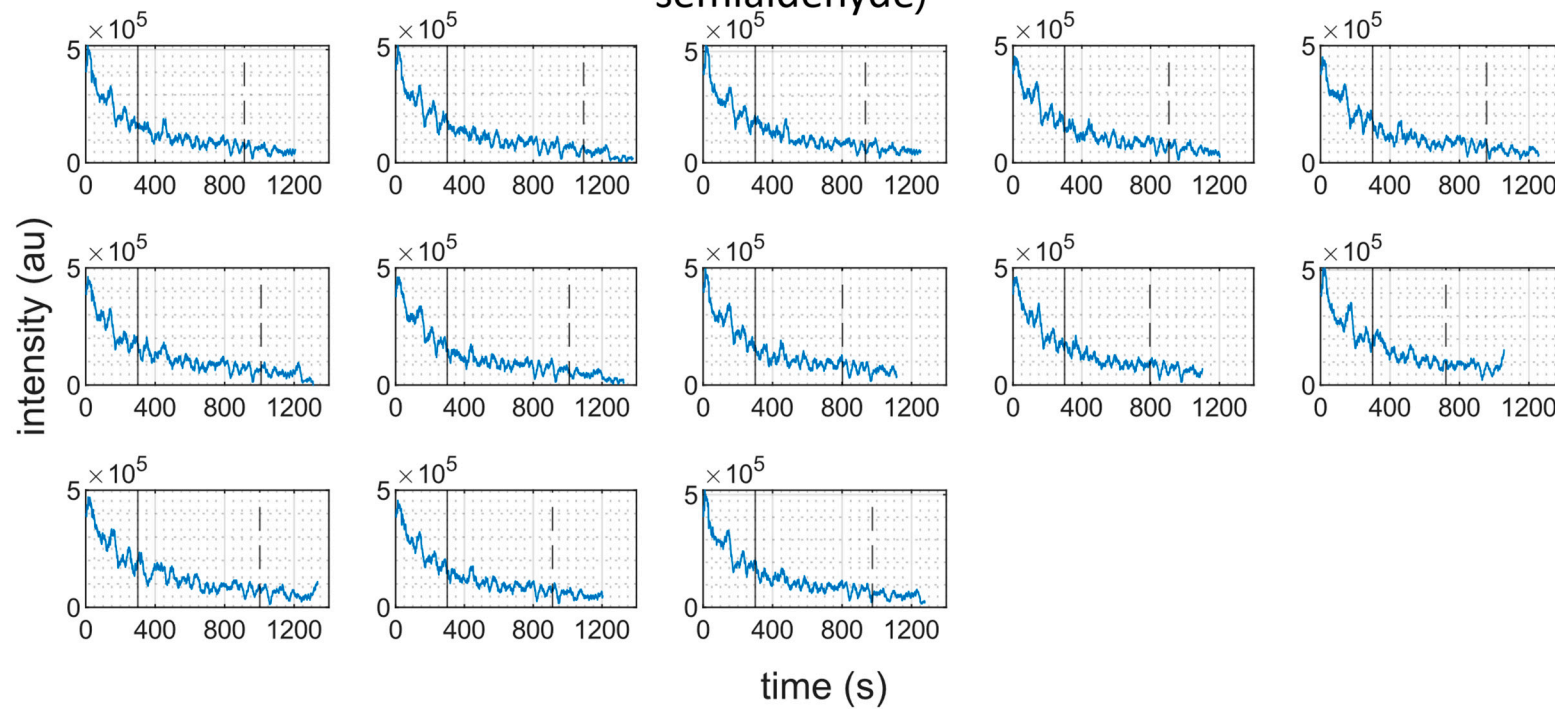

m/z 145.0142 (oxoglutarate)

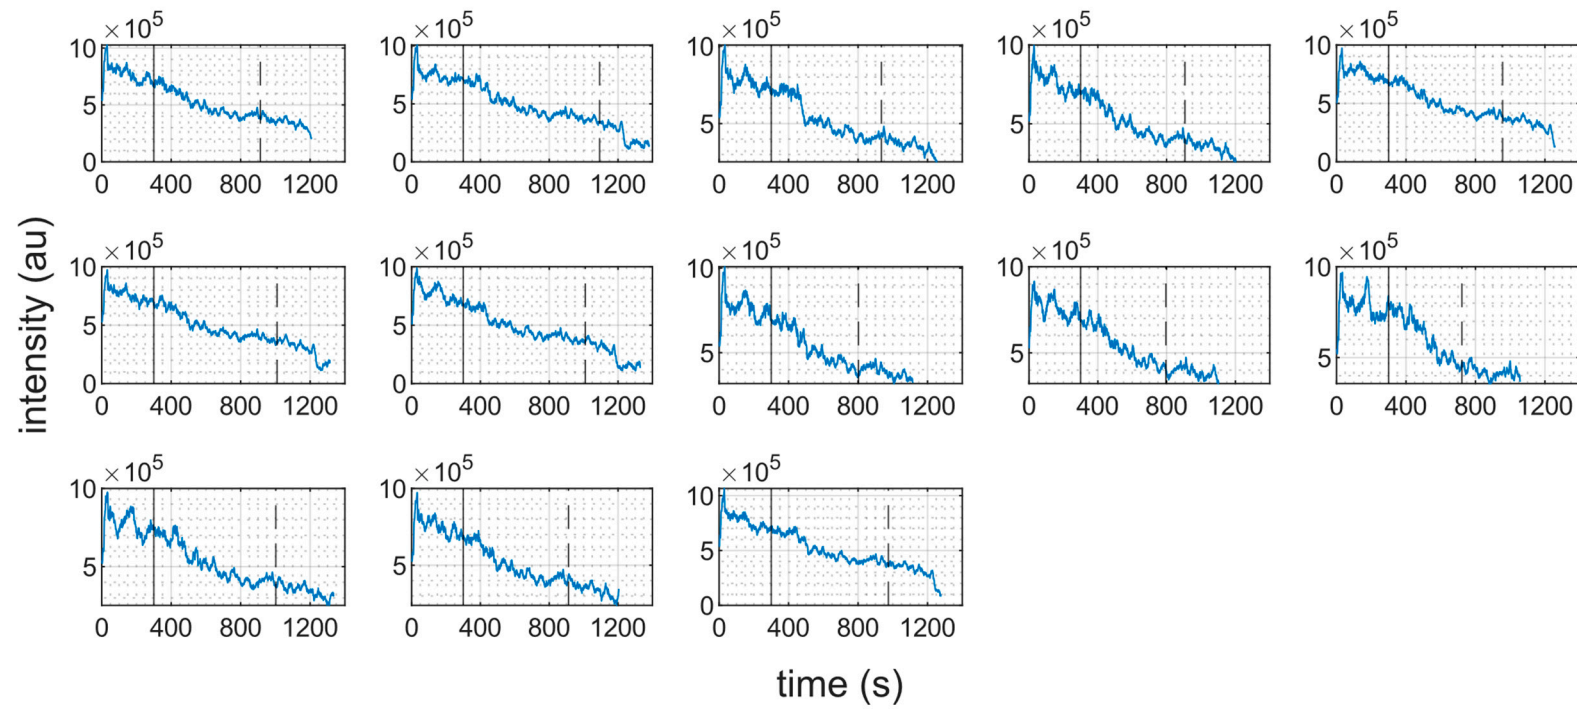

m/z 149.0455 (pentose)

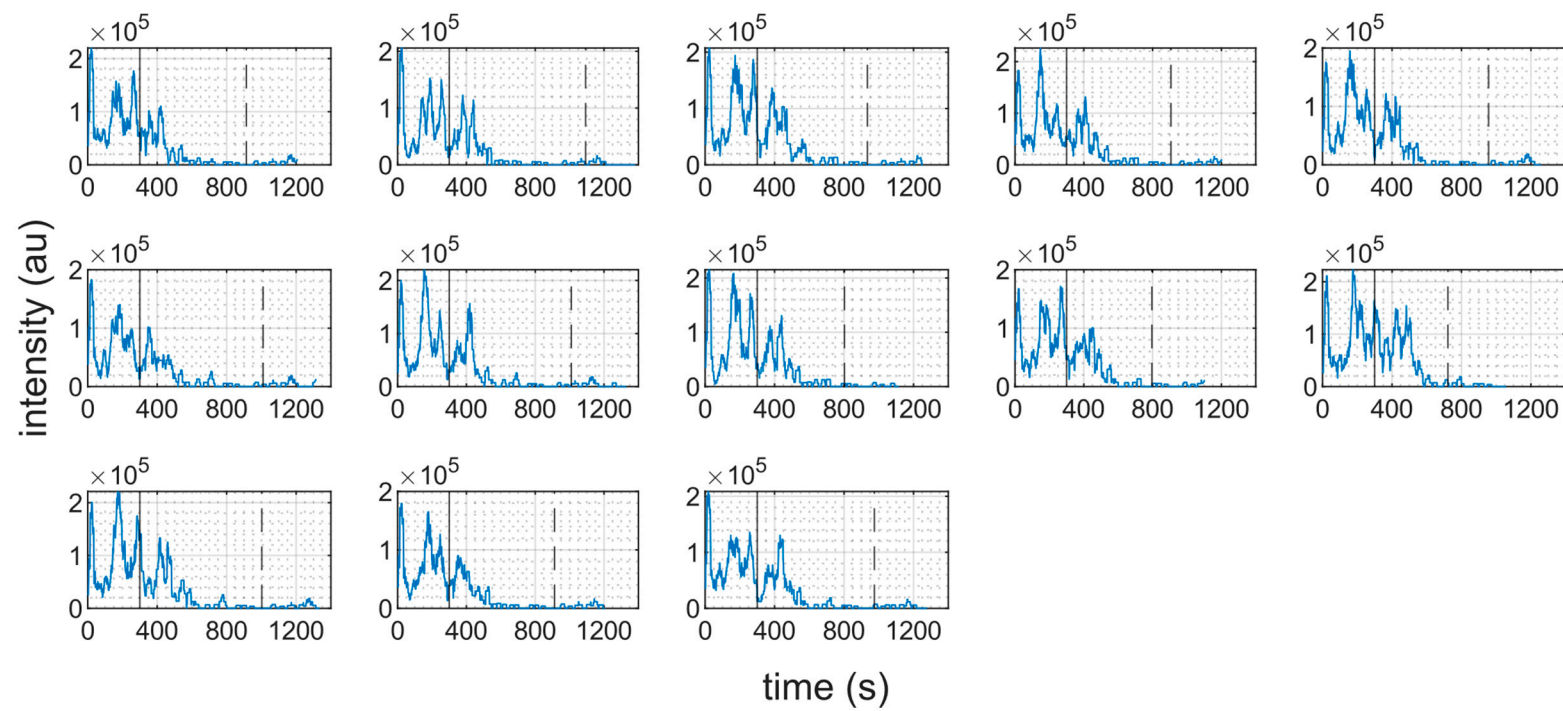

m/z 152.0353 (3-  
hydroxyanthranilate)

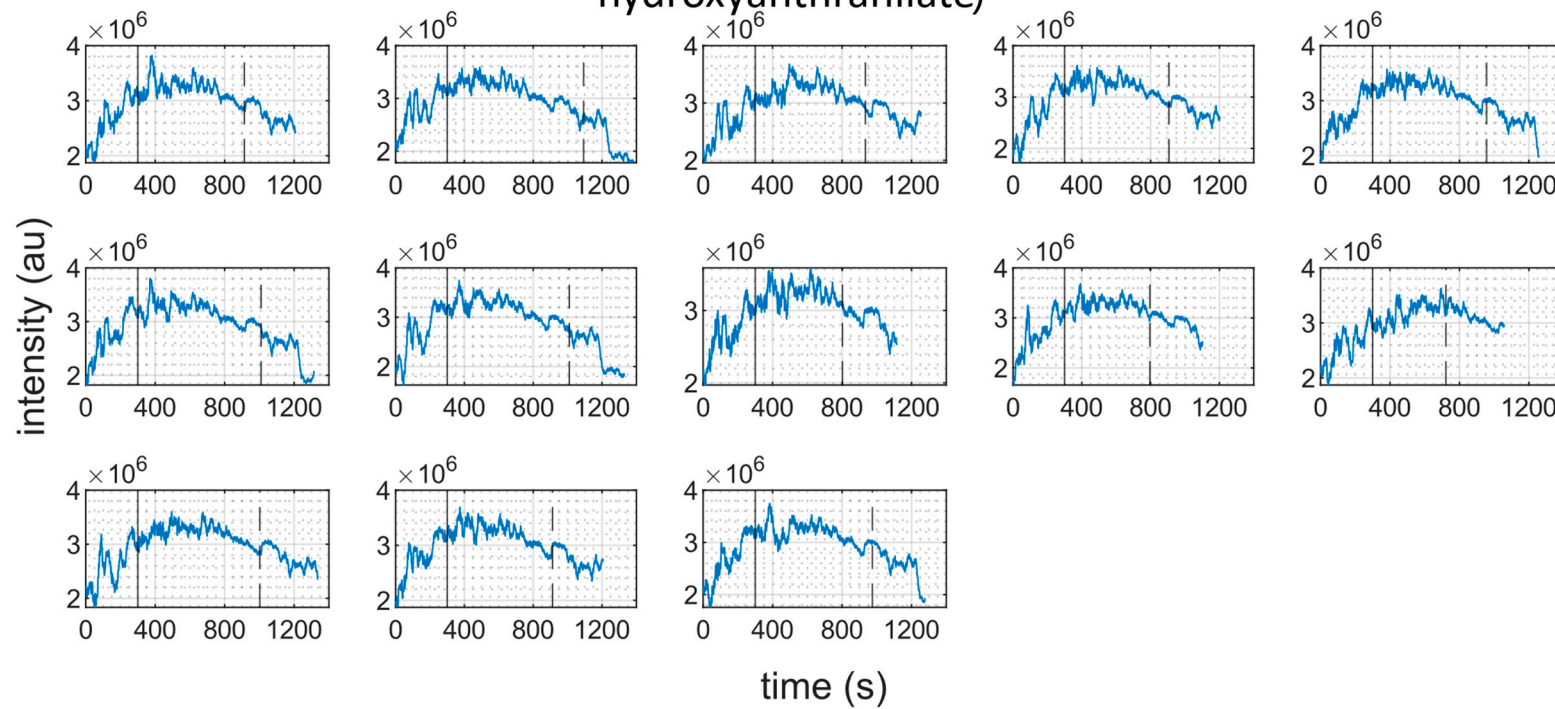



m/z 156.0302 (2-aminomuconate)

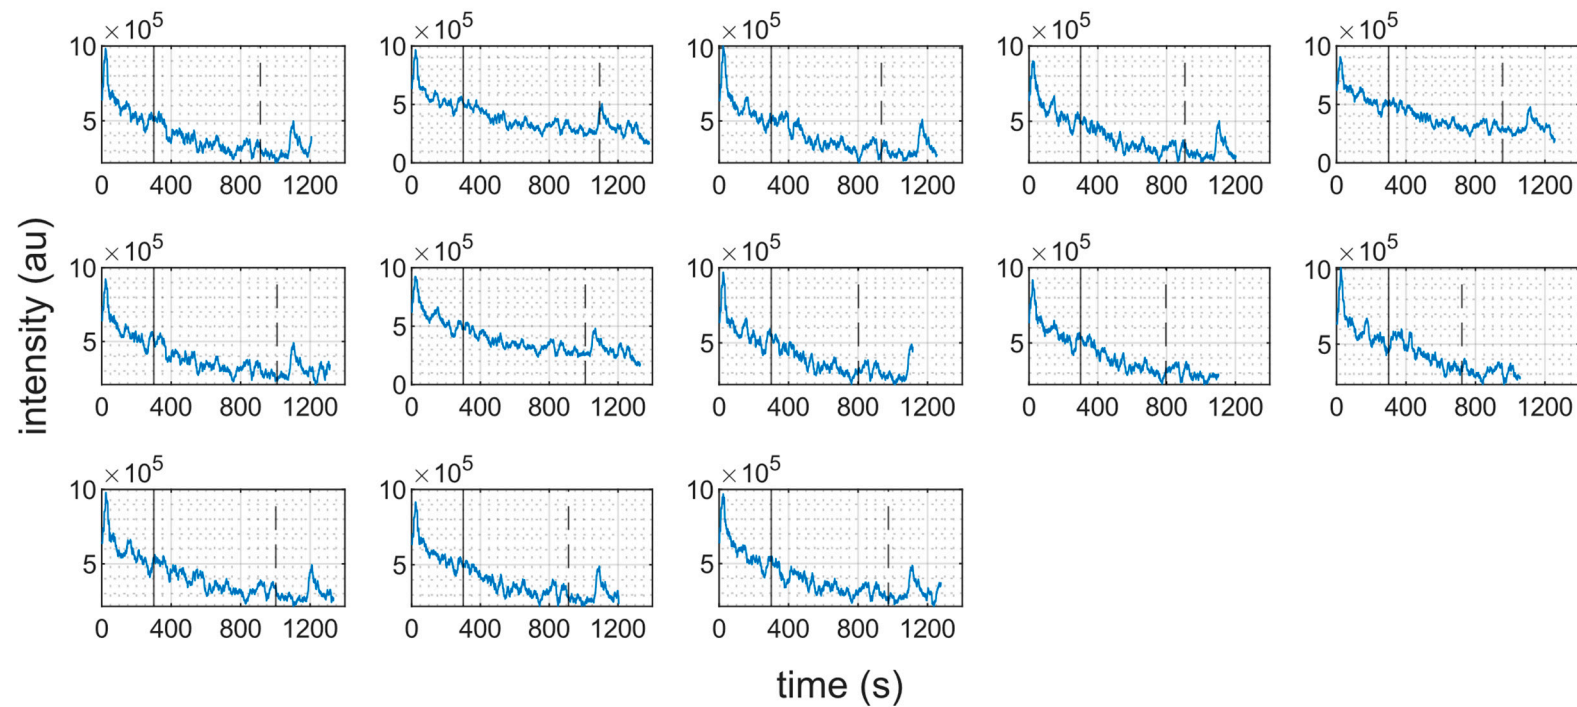

# m/z 159.0299 (oxoadipate)

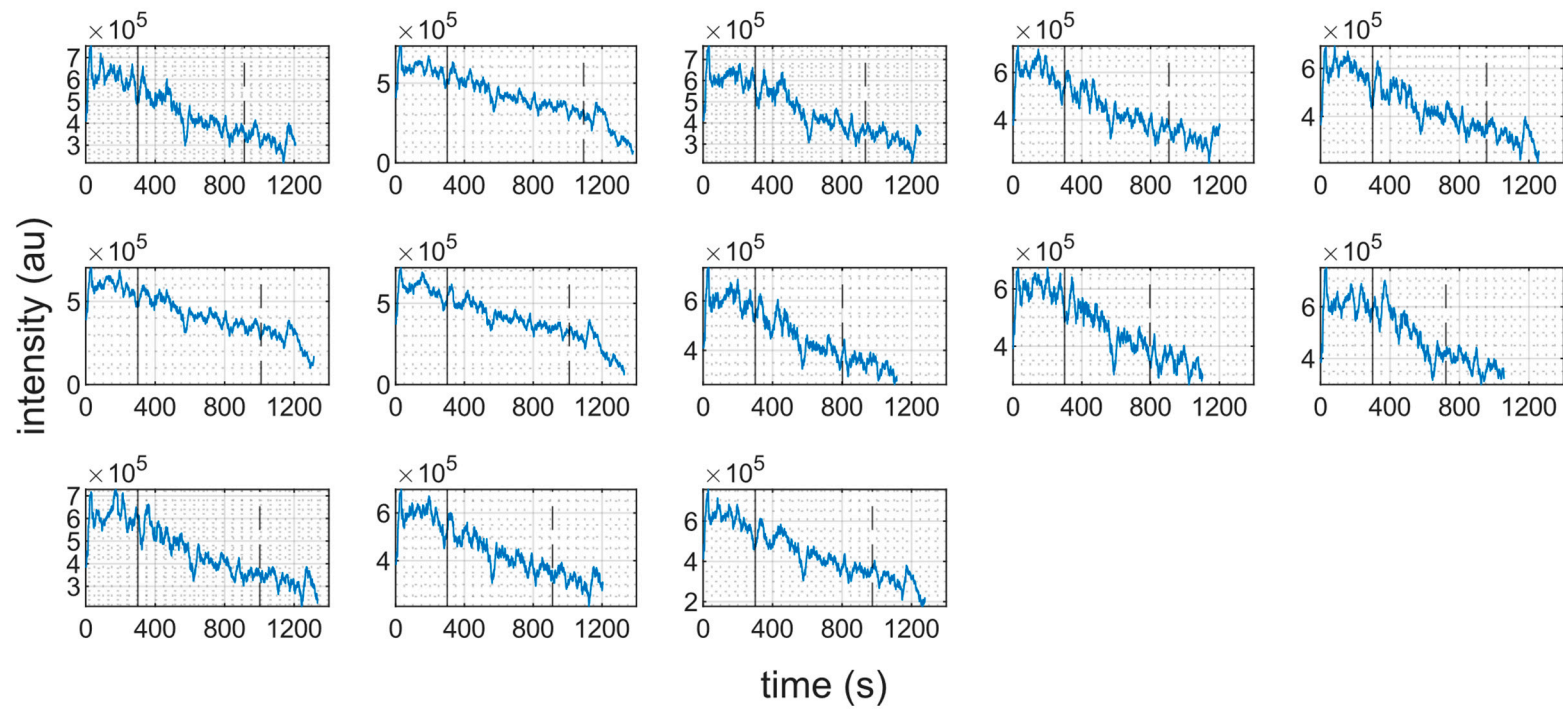



m/z 164.0353 (formylanthranilate)

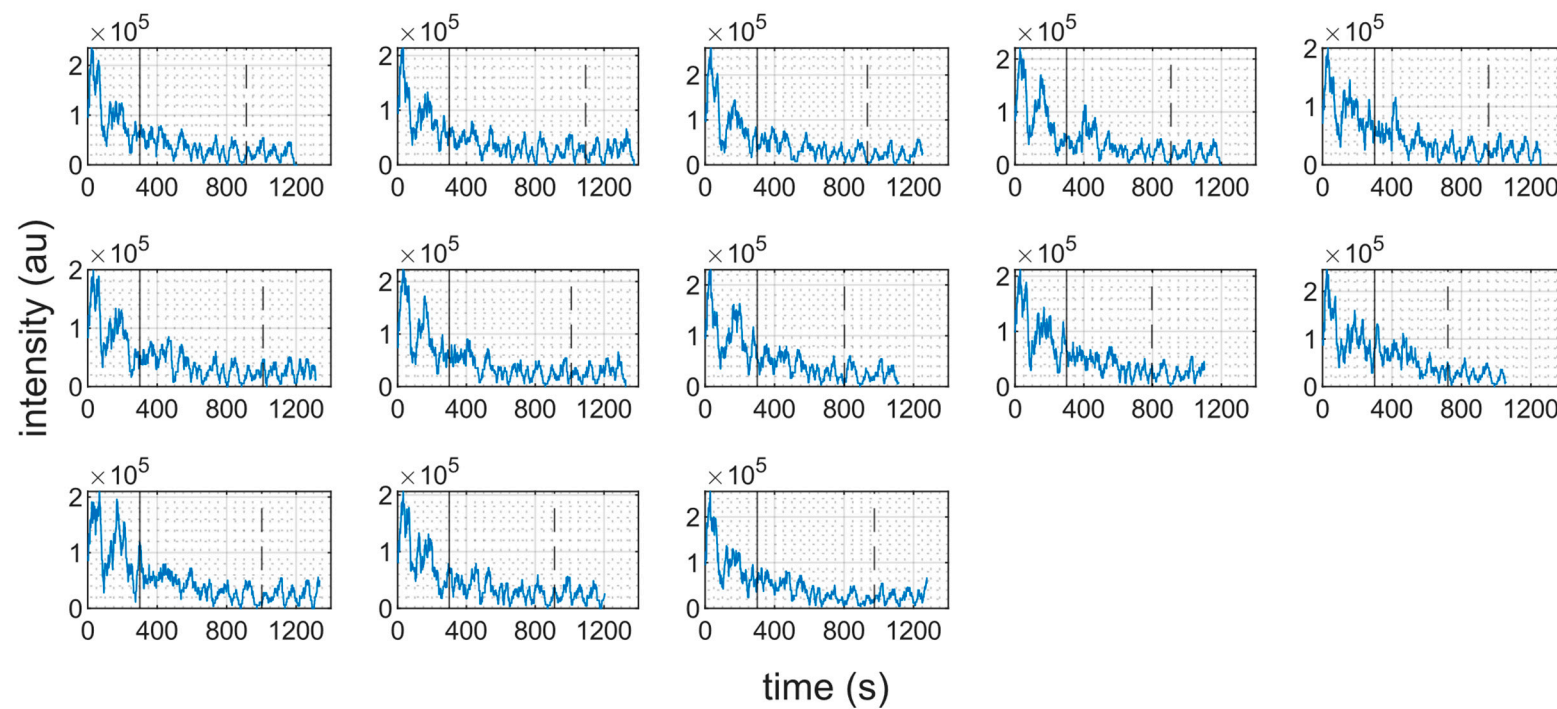

m/z 179.0562 (hexose)

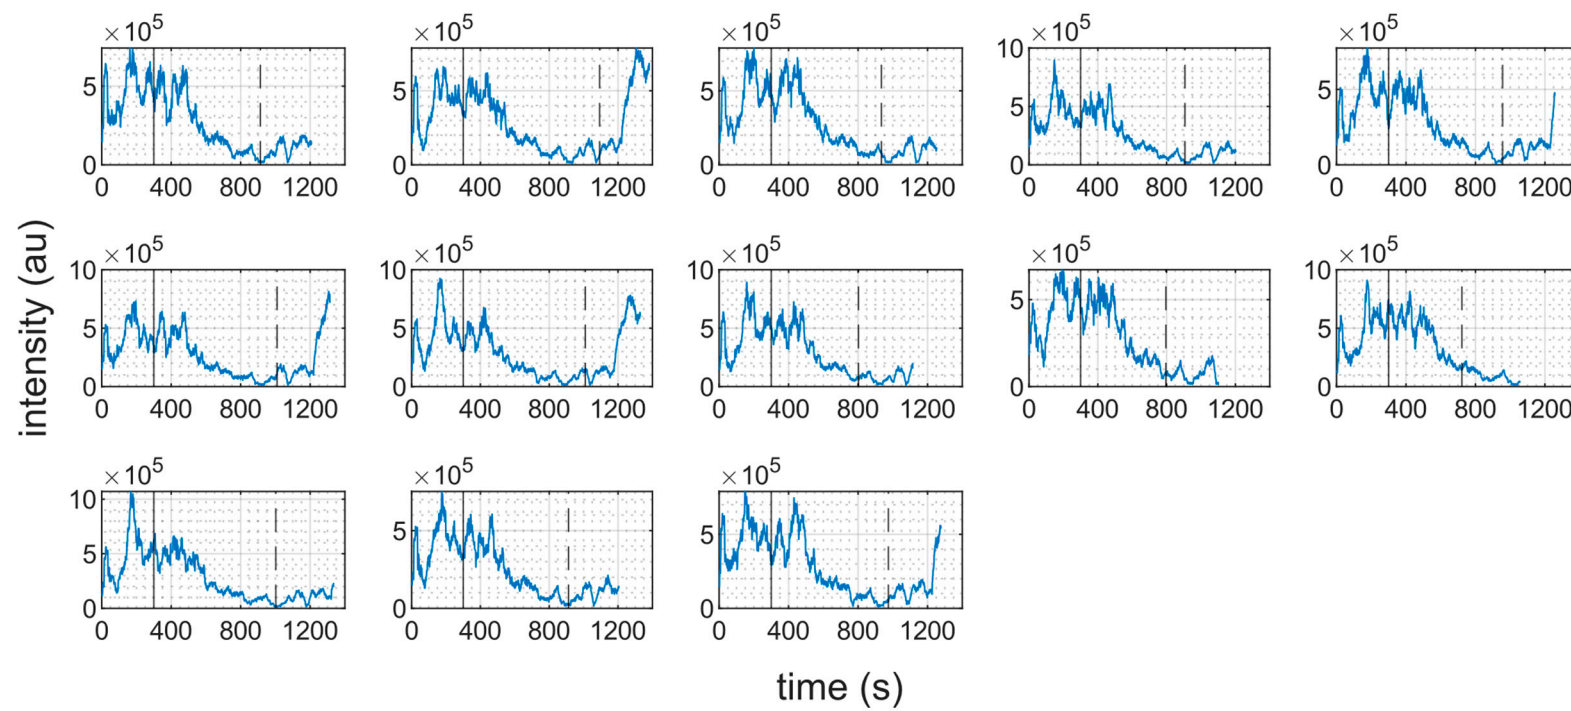

# m/z 183.1028 (oxodecenoic acid)

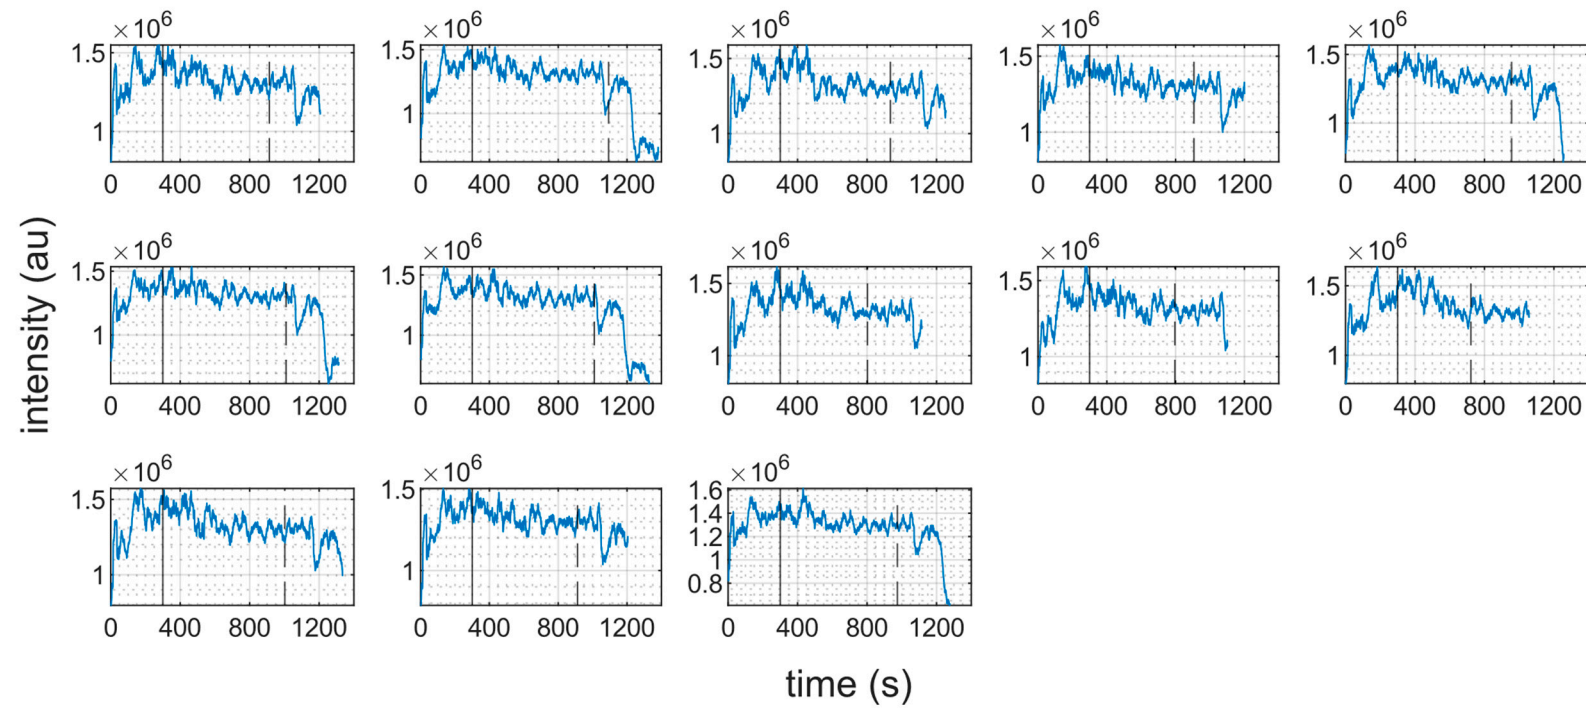

m/z 187.1341 (hydroxydecanoic acid)

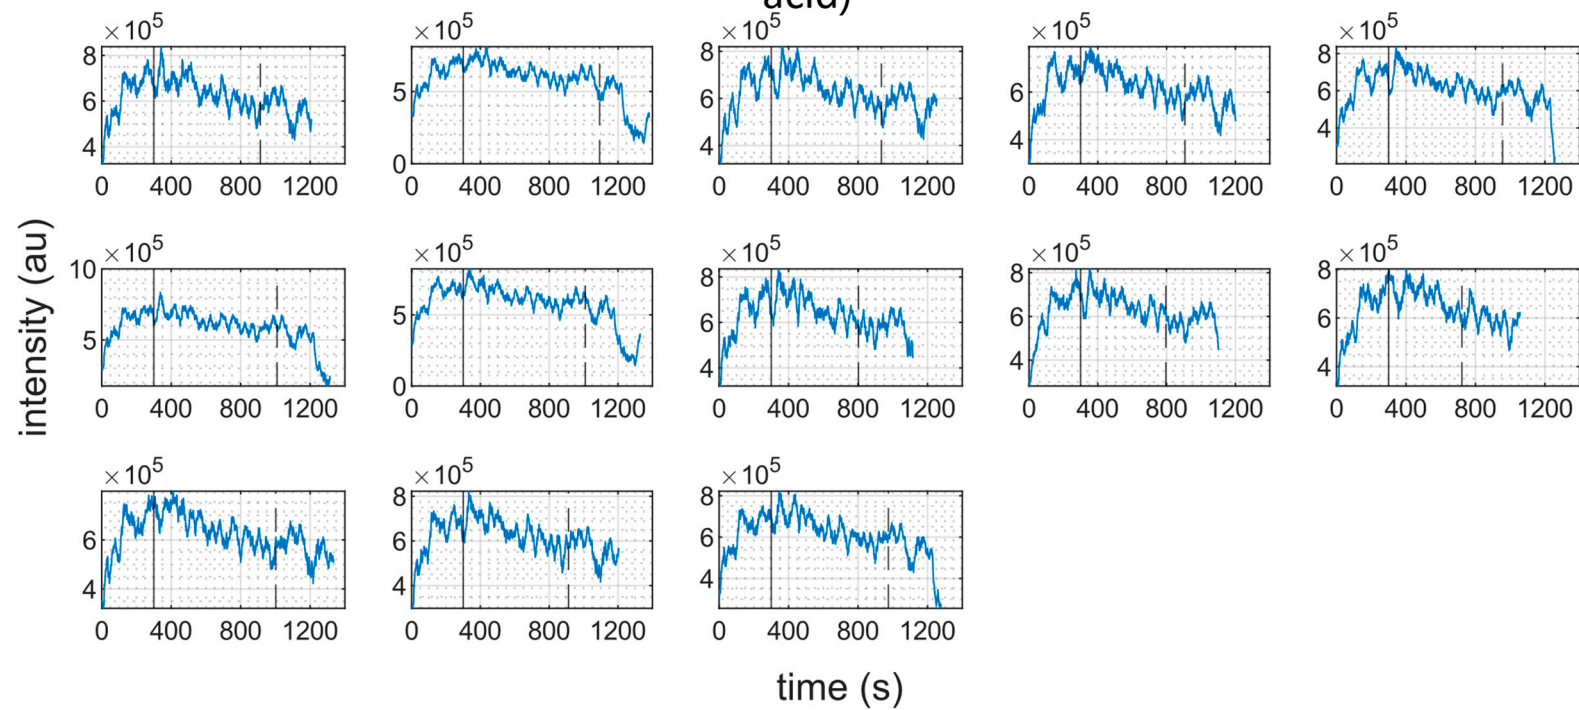

m/z 199.1705 (dodecanoic  
acid/lauric acid)

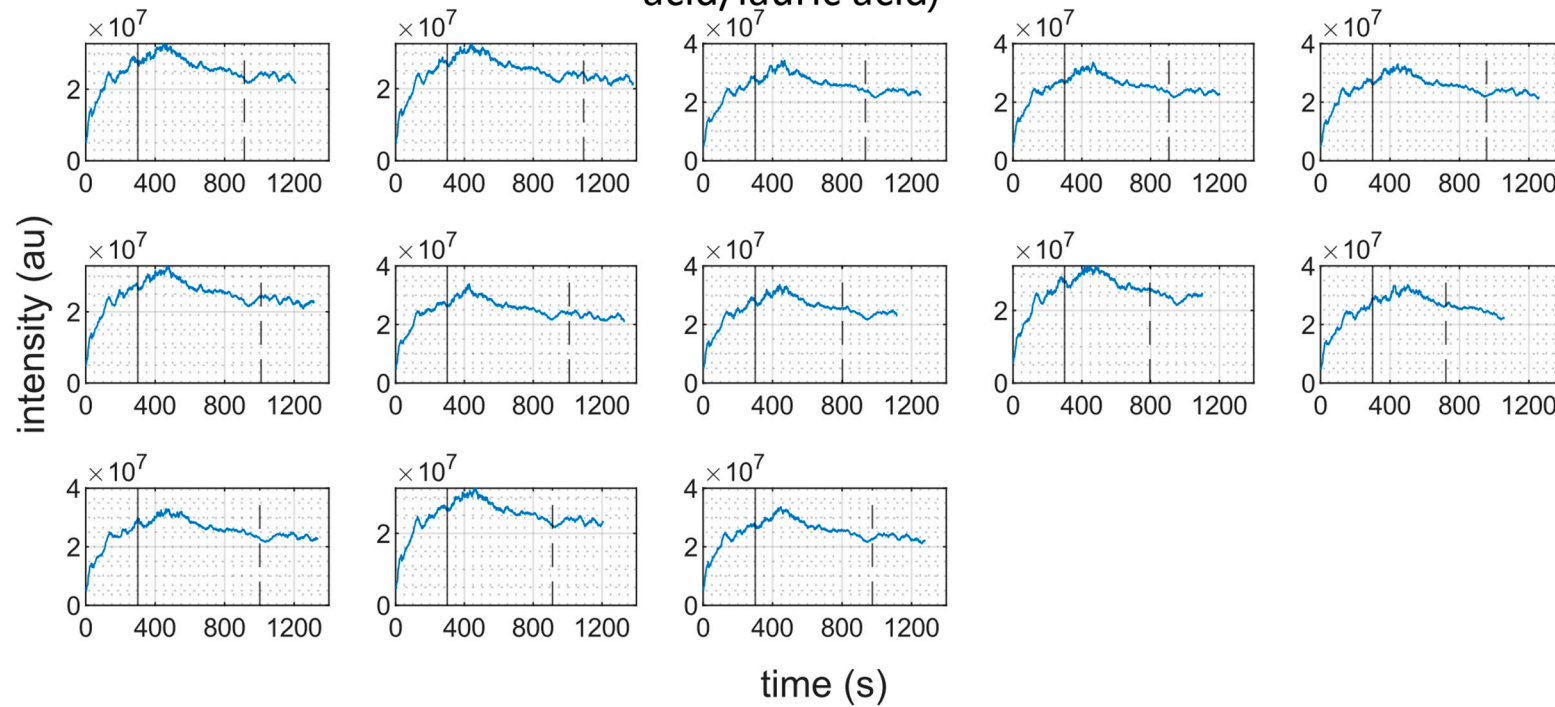



m/z 211.1340 (oxododecenoic  
acid)

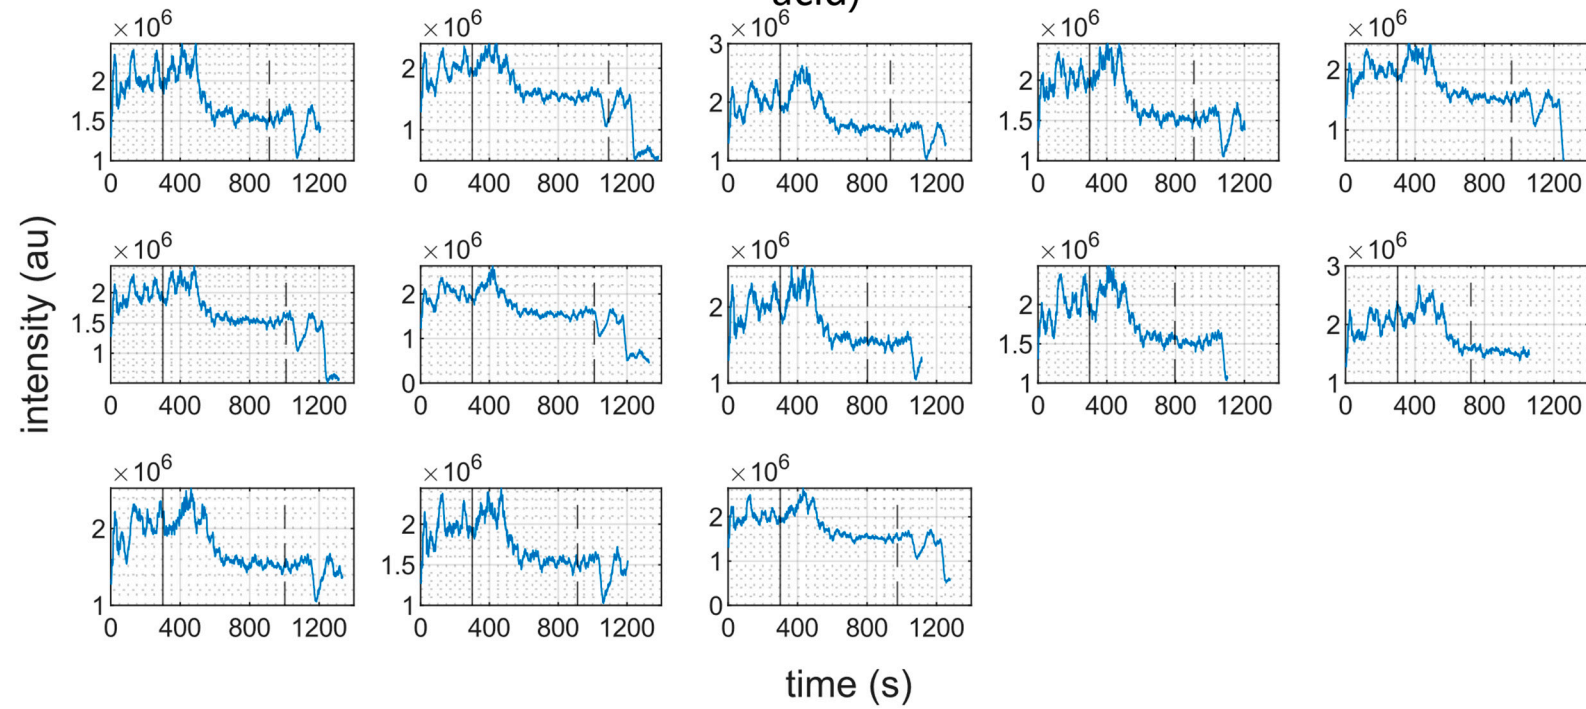

m/z 227.2018 (tetradecanoic  
acid/myristic acid)

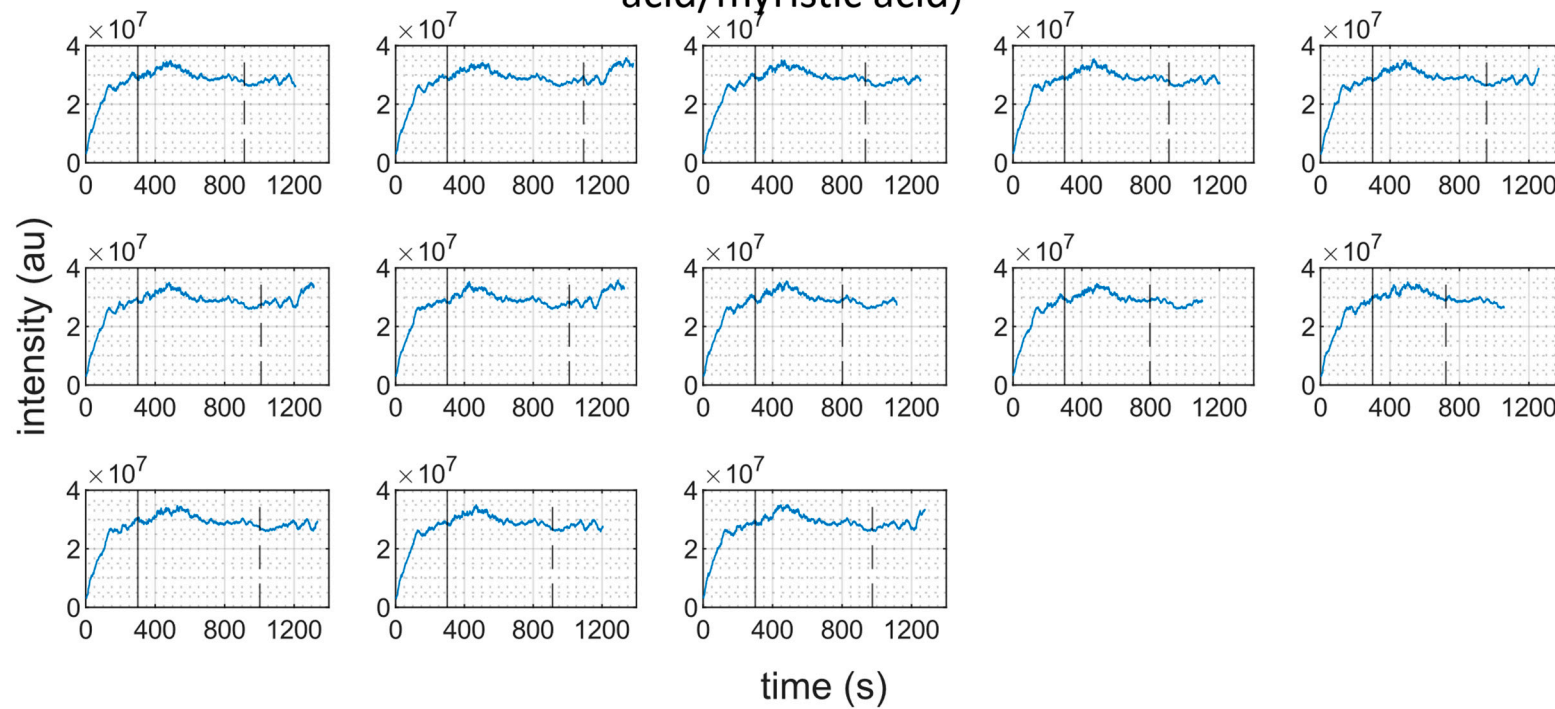



m/z 255.2329 (hexadecanoic acid)

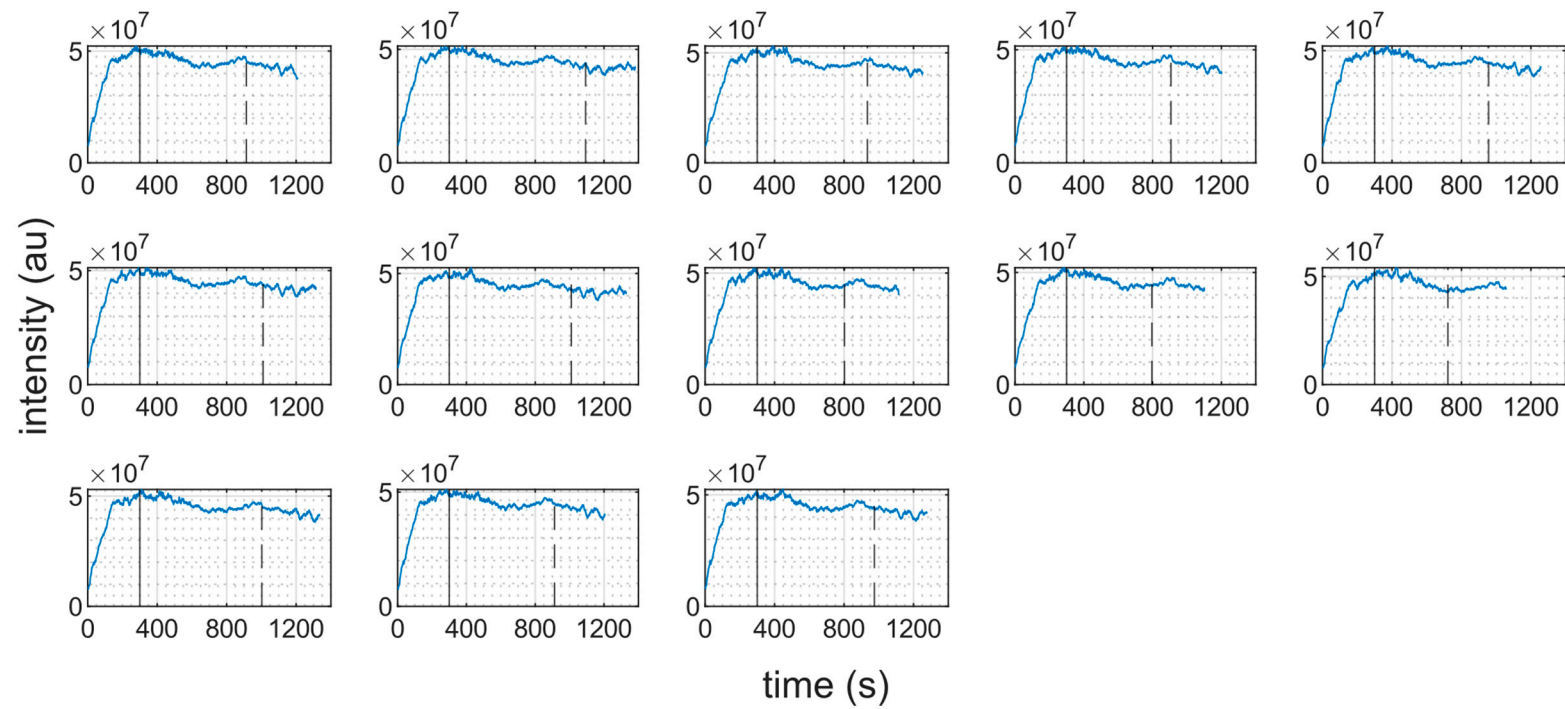

m/z 283.2643 (octadecanoic acid)

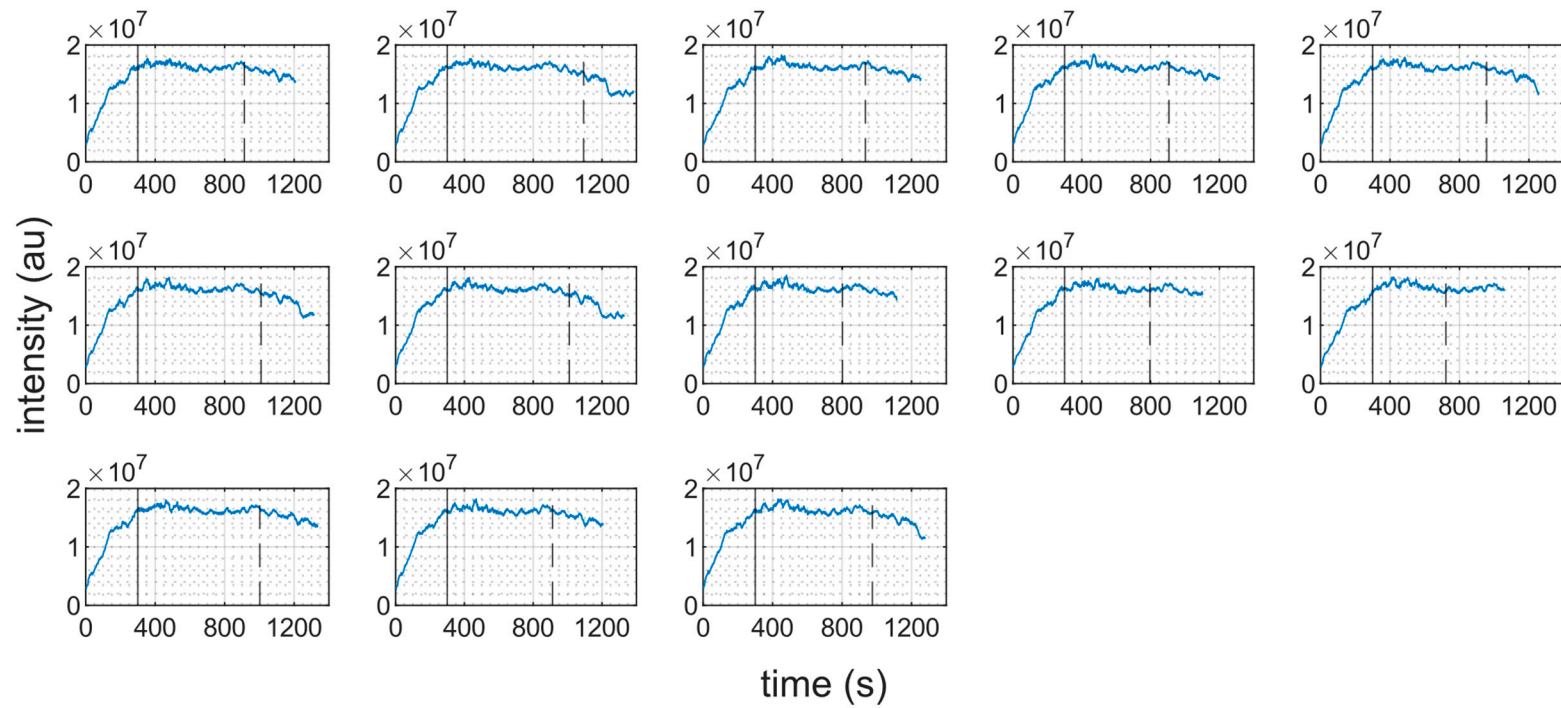

Supplement: s1 [file s1]
