# Supplementary material for: Real-Time Monitoring of Metabolism during Exercise by Exhaled Breath
Source: MDPI journal article supplement (doi:10.3390/metabo11120856), 2021-12-08
Supplement: s1 [file s1]

## Arterial blood gas

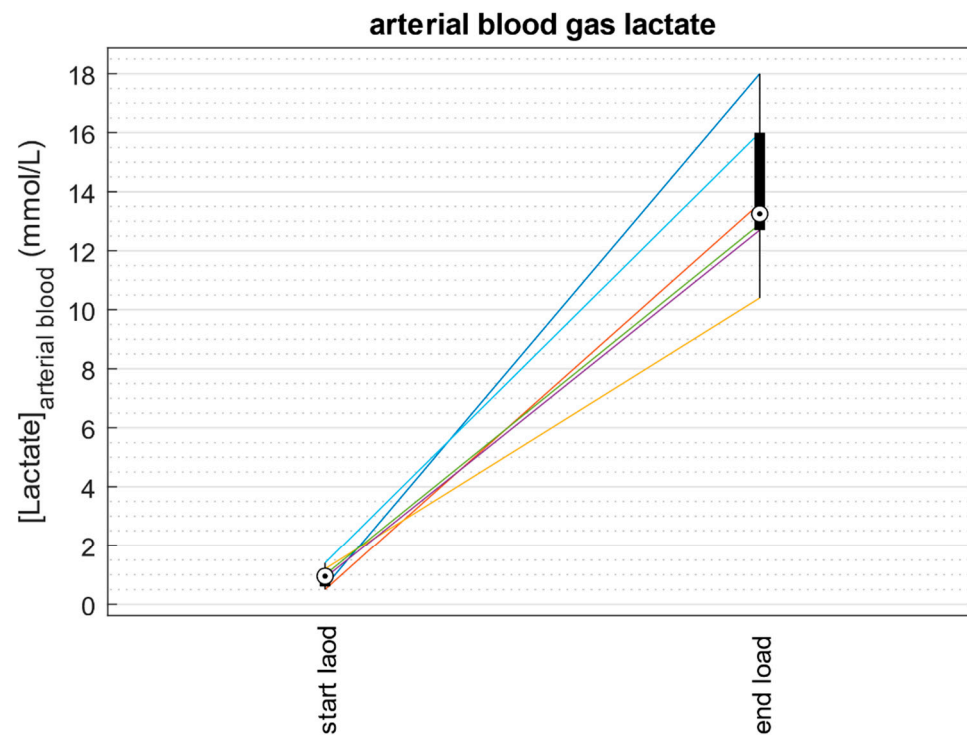

**Figure S1.** Arterial blood gas measurements of subjects with successful measurements at the beginning of the experiment and at time of complete exhaustion (subject 2 and 7-11). There was a significant increase of arterial blood lactate concentration in all subjects.
