# Supplementary material for: Real-Time Monitoring of Metabolism during Exercise by Exhaled Breath
Source: Metabolites. 2021 Dec 8;11(12):856. doi: 10.3390/metabo11120856 (PMC8709070; doi:10.3390/metabo11120856)
Supplement: Supplementary file 1 [file metabolites-11-00856-s001.zip]

Archive with 4 entries (4 files):
- Figure_S1.pdf
- Figure_S2.pdf
- Figure_S3.pdf
- Figure_S4.pdf
